# Biphasic effects of IL-27 during *Staphylococcus aureus* implant-associated osteomyelitis in mice

Yugo Morita<sup>a</sup>, Anthony M. Franchini<sup>b</sup>, John R. Owen<sup>c</sup>, John C. Martinez<sup>a</sup>,  
John L. Daiss<sup>a,d</sup>, Karen L. de Mesy Bentley<sup>a,d,e</sup>, Stephen L. Kates<sup>c</sup>,  
Edward M. Schwarz<sup>a,e</sup> and #Gowrishankar Muthukrishnan<sup>a,e</sup>

<sup>a</sup>Center for Musculoskeletal Research, University of Rochester Medical Center, Rochester, NY, USA

<sup>b</sup>Department of Environmental Medicine, University of Rochester School of Medicine and Dentistry, Rochester, NY, USA

<sup>c</sup>Department of Orthopaedic Surgery, Virginia Commonwealth University, Richmond, VA, USA

<sup>d</sup>Department of Orthopaedics, University of Rochester Medical Center, Rochester, NY, USA

<sup>e</sup>Department of Pathology and Laboratory Medicine, University of Rochester Medical Center, Rochester, NY, USA

## #Corresponding Author:

Gowrishankar Muthukrishnan, Ph.D.

The Center for Musculoskeletal Research

Department of Orthopaedics

University of Rochester Medical Center

601 Elmwood Avenue, Box 665

Rochester, NY 14642

**Phone:** 585-273-5632, **Fax:** 585-276-2177

**E-mail:** Gowri\_Shankar@URMC.Rochester.edu

**Conflict of interest statement:** The authors have declared that no conflict of interest exists.

**Running title:** Biphasic effects of IL-27 during *S. aureus* osteomyelitis

**Keywords:** interleukin-27, *S. aureus*, osteomyelitis, staphylococcal abscess, osteolysis, host-pathogen interactions

33 **Abstract**

34 Interleukin-27 is a pleiotropic cytokine whose reported functions during bacterial infections are debated  
35 as an area of active research. To address this, we investigated the role of IL-27 signaling during  
36 *Staphylococcus aureus* osteomyelitis. Clinically, we observed elevated serum IL-27 levels (20-fold  
37 higher,  $p < 0.05$ ) in patients with *S. aureus* osteomyelitis compared to uninfected patients undergoing  
38 elective total joint replacement. Remarkably, IL-27 serum levels immediately following septic death  
39 were 60-fold higher vs. uninfected patients ( $p < 0.05$ ), suggesting that IL-27 may be a biomarker of end-  
40 stage infection and/or cytokine storm. To test this, we hypothesized that IL-27 mediates bacterial  
41 clearance during the acute phase of *S. aureus* osteomyelitis, and subsequently suppresses inflammation  
42 to prevent cytokine storm and osteolysis during chronic infection. In mice, we observed that systemic  
43 IL-27 delivery by a recombinant adeno-associated viral vector (rAAV-IL-27) ameliorates surgical site  
44 soft tissue infection and peri-implant bone loss during the establishment of implant-associated *S. aureus*  
45 osteomyelitis. This effect was not observed in IL-27 receptor  $\alpha$  knock-out mice, suggesting a direct role  
46 of IL-27/IL-27R signaling on immune and bone cell functions. Examination of IL-27-mediated immune  
47 responses via transcriptome analyses of infected tibiae demonstrated that IL-27 is a biphasic cytokine  
48 with IL-27/IL-27R activating immunostimulatory responses including Th17, IL-2, TLR, and iNOS  
49 signaling early, and subsequently suppressing these pathways during chronic infection. Ex vivo  
50 confirmation using murine macrophages revealed that IL-27 co-stimulates TLR signaling to increase the  
51 production of nitric oxide, and immunomodulatory cytokines such as IL-10, IL-21, IL-31, and TNF- $\beta$ ,  
52 but is not a chemokine.

53 **Author Summary**

54 *Staphylococcus aureus* is the most common pathogen in orthopaedic infections, and hard-to-treat  
55 (MRSA) strains cause >50% of these infections. Thus, there is an urgent need to develop  
56 immunotherapies to treat these life-threatening *S. aureus* infections. Currently, the role of  
57 multifunctional IL-27 on *S. aureus* osteomyelitis is unknown. In a clinical study, we observed that IL-27  
58 is an important biomarker for identifying *S. aureus* osteomyelitis patients, and that elevated serum IL-27  
59 levels correlated with adverse clinical outcomes, such as septic death. In our efforts to uncover the  
60 underlying mechanisms, we reveal that IL-27 is a biphasic cytokine, activating proinflammatory  
61 immune pathways, including Th17 responses, early during acute *S. aureus* osteomyelitis, and  
62 subsequently repressing them during the chronic phase to prevent cytokine storm and bone damage.  
63 These results indicate that immune modulation of IL-27/IL-27R signaling could be a viable therapeutic  
64 strategy in mitigating *S. aureus* osteomyelitis.

## 65 **Introduction**

66 Deep bone infections continue to be the bane of orthopaedic surgery, with infection rates essentially  
67 remaining at 1-2% for elective surgery over the past 50 years, despite significant medical advances [1-  
68 3]. *Staphylococcus aureus* is the major pathogen in orthopaedic infections. It is responsible for causing  
69 10,000-20,000 prosthetic joint infections (PJI) annually in the United States alone [4, 5] and 30-42% of  
70 fracture-related infections (FRI) [6, 7]. Unfortunately, these difficult-to-treat *S. aureus* bone infections  
71 are associated with poor clinical outcomes and high recurrence rates following revision surgery [8, 9].  
72 With increasing methicillin-resistant *S. aureus* (MRSA) osteomyelitis incidence rates, and emerging  
73 strains with pan-resistance [10, 11], there is an urgent need for novel immunotherapies to supplement  
74 existing antibiotic therapies.

75 *S. aureus* causes the most lethal form of human sepsis with a 10% mortality rate, and a  
76 catastrophic outcome of osteomyelitis is death due to sepsis and multiple organ failure [12, 13]. The  
77 mechanisms behind *S. aureus* osteomyelitis-induced sepsis are largely unknown. Interestingly, several  
78 studies have reported elevated serum IL-27 levels during sepsis, suggesting that IL-27 could potentially  
79 be a diagnostic biomarker of sepsis [14-19]. IL-27 is a heterodimeric cytokine belonging to the IL-12  
80 cytokine family and is mainly produced by antigen presenting cells such as macrophages, monocytes,  
81 and dendritic cells [20, 21]. It is composed of IL-27p28 and EBI3 subunits, and signals through a  
82 heterodimeric cell surface receptor composed of IL-27 receptor  $\alpha$  (IL-27R $\alpha$ ) and gp130 [22, 23]. Like  
83 IL-12, it signals mainly through the JAK-STAT intracellular pathway and plays a central role in multiple  
84 immune regulation activities. It downregulates Th17 differentiation, stimulates regulatory T cell  
85 formation, and directly modifies CD4<sup>+</sup> T cell effector functions to induce anti-inflammatory IL-10 [20,  
86 21, 24, 25]. Studies involving cecal ligation and puncture (CLP)-induced bacterial sepsis and *S. aureus*  
87 pneumonia following influenza demonstrated that IL-27 regulates enhanced susceptibility to infection  
88 by attenuating Th17 immunity and promoting IL-10 induction [26, 27]. These studies highlight the

89 importance of IL-27 in immune suppression. On the other hand, IL-27 has been reported to promote  
90 proliferation and differentiation of hematopoietic stem cells [28], increase production of  
91 proinflammatory cytokines by monocytes [29, 30], and induce Th1 differentiation [31]. Currently, the  
92 role of IL-27 in host immunity during *S. aureus* osteomyelitis is unknown. Here, we tested the  
93 hypothesis that IL-27 is a biphasic cytokine that enhances bacteria killing via promoting inflammation  
94 early during acute *S. aureus* osteomyelitis, and subsequently suppresses inflammation during chronic  
95 bone infection to prevent cytokine storm and osteolysis. Consistent with this theory, we report that IL-27  
96 is induced in patients with *S. aureus* osteomyelitis, and elevated serum IL-27 correlated with septic  
97 death in these patients. Examining IL-27's role in mice revealed that this cytokine is crucial for carefully  
98 balancing the host immunostimulatory and immunosuppressive responses during *S. aureus*  
99 osteomyelitis.

100

## 101 **Results**

### 102 ***S. aureus* infection induces IL-27 secretion in patients and in mice**

103 To better understand host immune responses against *S. aureus* osteomyelitis, we analyzed sera from  
104 healthy people, orthopaedic patients with culture-confirmed *S. aureus* bone infections, and patients who  
105 died from septic *S. aureus* osteomyelitis. Serum IL-27 levels were significantly elevated in infected  
106 patients compared to uninfected individuals (20-fold higher,  $p < 0.05$ ). Remarkably, IL-27 levels  
107 immediately following septic death were 60-fold higher (**Fig. 1A**,  $p < 0.05$ ), suggesting that IL-27 could  
108 be an essential biomarker for *S. aureus* osteomyelitis-induced septic death. Indeed, formal analyses of  
109 IL-27 as a diagnostic biomarker using receiver operator characteristic (ROC) curve analysis revealed a  
110 high area under the curve (AUC) of 0.922 (**Fig. 1B**,  $p < 0.0001$ ). We also evaluated whether *S. aureus*  
111 infection directly induces IL-27 production in murine macrophages in vitro. Interestingly, in both RAW  
112 264.7 macrophages and murine bone marrow-derived macrophages, *S. aureus* induced significant IL-27

113 secretion 24 hours post infection in M0, M1, and M2 murine macrophages (**Fig. 1C-D**,  $p < 0.05$ ).  
114 Collectively, these data indicate an important role for IL-27 in host immunity against *S. aureus*  
115 infections.

### 116 **Systemic IL-27 delivery inhibits draining abscess formation and bone osteolysis during** 117 **establishment of *S. aureus* osteomyelitis**

118 Having established an association between IL-27 and *S. aureus* osteomyelitis in patients and mice, we  
119 next examined if IL-27 mediates bacterial clearance during *S. aureus* osteomyelitis using our well-  
120 established murine model of osteomyelitis [32-36]. Mice were challenged with bioluminescent MRSA  
121 (USA300 LAC::lux ) via transtibial implantation of a contaminated stainless-steel implant following  
122 intramuscular injection of rAAV-IL-27 or adeno-associated virus expressing recombinant GFP (rAAV-  
123 GFP, control). Before the in vivo infection experiment, we confirmed exogenous IL-27 expression in  
124 mouse sera out to day 24 following intramuscular injection of rAAV-IL-27 (**Fig. 2A**). While rAAV-IL-  
125 27 treatment did not show an effect on in vivo *S. aureus* growth as assessed by bioluminescent intensity  
126 (BLI) (**Fig. 2B**), rAAV-IL-27 treated mice showed greater body weight recovery following septic-  
127 surgery compared to rAAV-GFP treated animals (**Fig. 2C**). Remarkably, rAAV-IL-27 treated animals  
128 showed much smaller draining abscess formation at the site of bone infection (**Fig. 2D**). Ex vivo CFU  
129 analyses confirmed that the bacterial load in surgical site soft tissues was significantly lower in rAAV-  
130 IL-27 treated mice (**Fig. 2E**). Moreover, high-resolution  $\mu$ CT demonstrated that peri-implant osteolysis  
131 was decreased in mice treated with rAAV-IL-27 compared to rAAV-GFP treated animals (**Fig. 2F**).  
132 These results demonstrate that IL-27 affects abscess formation and bone osteolysis. Interestingly, CFU  
133 quantification on the implants revealed similar bacterial loads between groups suggesting that systemic  
134 IL-27 treatment does not affect biofilm formation on the implant. Indeed, scanning electron microscopy  
135 (SEM) interrogation confirmed these findings (**Supplemental Fig. 1**).

### 136 **Systemic IL-27 effects on *S. aureus* implant associated osteomyelitis in IL-27R $\alpha$ <sup>-/-</sup> mice**

137 Two possible scenarios can lead to the observed suppression of *S. aureus* SACs and reduced bone  
138 osteolysis at the surgical site. IL-27 could be a chemokine attracting myeloid cells to the site of *S.*  
139 *aureus* infection. Alternatively, IL-27/IL-27R signaling pathway could extrinsically be inducing  
140 chemotaxis of innate immune cells to the infection site. First, we examined if IL-27 is chemotactic of  
141 myeloid cells. In vitro chemotaxis assay using granulocytic HL-60 cells revealed that IL-27 did not  
142 promote migration of granulocytes through the Boyden chambers (**Supplemental Fig. 2**). IL-27 was  
143 also not chemotactic of primary bone marrow-derived macrophages (data not shown). Next, to test  
144 whether IL-27/IL-27R signaling was inducing chemotaxis of immune cells to cause the observed  
145 phenotype, we repeated the in vivo *S. aureus* osteomyelitis experiments using IL-27 receptor  $\alpha$  knock  
146 out (IL-27R $\alpha^{-/-}$ ) mice. At 14 days post infection, body weight changes (**Fig. 3A**) and BLI (**Fig. 3B**) were  
147 similar between IL-27R $\alpha^{-/-}$  mice treated with rAAV-IL-27 or rAAV-GFP. Most interestingly, ex vivo  
148 CFU on the implants, surgical site soft tissues, and tibia were similar in IL-27R $\alpha^{-/-}$  mice (**Fig. 3D**).  
149 Furthermore, no difference was detected in draining abscess formation on these implants (**Fig. 3C**) and  
150 gross assessment of peri-implant osteolysis (data not shown) between groups. These data indicate that  
151 the effects of rAAV-IL-27 on *S. aureus* osteomyelitis in WT mice were due to IL-27/IL-27R signaling.

152 **Identification of systemic IL-27 affected pathways during the establishment of implant-associated**  
153 **osteomyelitis**

154 Next, we sought to elucidate the mechanism of IL-27/ IL-27R signaling effects on *S. aureus*  
155 osteomyelitis via unbiased gene expression studies. MRSA-infected mouse tibiae from rAAV-IL-27-  
156 and rAAV-GFP-treated groups were harvested on days 1, 3, 7, and 14 post-septic surgery and subjected  
157 to bulk RNA sequencing. The number of differentially (up-regulated or down-regulated) expressed  
158 genes (DEGs) on each day are shown in **Fig. 4B**. Venn diagram analyses of DEGs revealed *IL-27*,  
159 prostaglandin E synthase (*PTGES*), and sodium/myo-inositol cotransporter (*SLC5A3*) to be the common  
160 overlapping nodal points across all time points (**Fig. 4C**). Expectedly, IL-27 expression in the infected

161 tibia was significantly up-regulated in mice treated with rAAV-IL-27 compared to rAAV-GFP at all  
162 time points (**Fig. 4D**), suggesting a positive feedback effect [37].

163 Additionally, Ingenuity Pathway Analysis (IPA) was performed to identify canonical pathways  
164 enriched between rAAV-IL-27 and rAAV-GFP treated animals (**Fig. 4E**). Examination of enriched  
165 pathways involved in innate and adaptive immunity revealed that pro-inflammatory immune pathways  
166 including IL-23 signaling pathway, Th17 activating pathway, IL-17 signaling, and IL-2 signaling were  
167 activated in rAAV-IL-27 treated mice during the acute phase of *S. aureus* osteomyelitis (day 1 post-  
168 surgery) compared to rAAV-GFP treated animals. Interestingly, these pathways were suppressed at later  
169 time points, especially on day 14, which represents the chronic phase of the disease. These data strongly  
170 indicate that IL-27 could be a biphasic cytokine, which activates pro-inflammatory immune pathways  
171 early upon *S. aureus* infection and suppresses them late to prevent tissue damage and cytokine storm.

### 172 **IL-27-mediated induction of pro-inflammatory cytokines early during *S. aureus* osteomyelitis and** 173 **their down-regulation during chronic infection**

174 RNAseq analyses revealed that genes associated with IL-23 signaling (**Fig. 5A**) and Th17 activation  
175 pathway (**Fig. 5B**) were significantly up-regulated in mice treated with rAAV-IL-27 on day 1 post-  
176 surgery, compared to rAAV-GFP animals. These genes include *IL17A*, *IL-17F*, *IL-21*, and *IL12B*. We  
177 confirmed that IL-27-pretreated murine macrophages induce moderate production of pro-inflammatory  
178 cytokines such as IL-21, IL-31, and TNF- $\beta$  early in response to *S. aureus* infection (**Table 1**). Of note,  
179 anti-inflammatory cytokine IL-10 was also modestly up-regulated in these macrophages suggesting a  
180 pleiotropic nature for IL-27. Remarkably, pro-inflammatory cytokine coding genes such as *IL17A*,  
181 *IL12A*, *TNF*, and *IL-6* were down-regulated later at day 14 during the chronic phase of infection (**Fig.**  
182 **5A-B**). Utilizing the DEG data, we also assessed the top regulatory networks in IPA for these genes to  
183 provide further insight into the effects of differential gene expression in our dataset (**Supplemental**  
184 **Table 1**). Our analyses indicated that regulatory genes such as HSP90B1 and EGR2, up-regulated pro-  
185 inflammatory cytokine-coding genes *IL21*, *IL17A*, *IL12B*, *IL17F*, and *RORC* in rAAV-IL-27 treated



186 mice. *RORC* encode the Th17 master transcription factor ROR $\gamma$ t [38]. Additionally, transcriptome  
187 analyses revealed that immunostimulatory genes associated with Toll-like receptor (TLR) (**Fig. 5C**) and  
188 iNOS (**Fig. 5D**) signaling pathways were suppressed at later stages of *S. aureus* infection. However,  
189 their expression levels during the early infection phase (day 1) were equivocal. Indeed, we confirmed  
190 that combination of IL-27 and TLR agonist lipopolysaccharide (LPS) stimulation increased nitric oxide  
191 (NO<sup>-</sup>) production in primary macrophages, suggesting a co-immunostimulatory effect on TLR signaling  
192 (**Supplemental Fig. 3**). Collectively, these results indicate that IL-27 modulates immune homeostasis  
193 by promoting the production of pro-inflammatory cytokines early upon *S. aureus* infection and  
194 suppressing them late to prevent tissue damage.

### 195 **rAAV-IL-27 treatment inhibits osteoclast formation during implant-associated osteomyelitis**

196  $\mu$ CT demonstrated that peri-implant osteolysis was decreased in infected mice subjected to rAAV-IL-27  
197 treatment. Therefore, we hypothesized that systemic IL-27 treatment suppresses inflammatory  
198 osteoclasts to prevent bone damage during *S. aureus* osteomyelitis. IPA and gene expression analyses  
199 revealed that RANK signaling in osteoclasts was suppressed in the infected tibiae of rAAV-IL27 treated  
200 animals on days 3, 7, and 14 (**Fig. 4E, 6A**). Histopathology confirmed the suppression effect of IL-27 on  
201 osteoclasts (**Fig. 6B**), where systemic IL-27 induced significantly less osteoclast activation in trabecular  
202 bone (**Fig. 6C**).

203

## 204 **Discussion**

205 Cytokines, including IL-27, are central to mounting an immune response during infection, and  
206 elucidation of IL-27 functions throughout infection is essential to our understanding of protective vs.  
207 susceptible host immunity [20]. In this study, we examined the role of IL-27 during *S. aureus*  
208 osteomyelitis as clinical studies revealed elevated serum IL-27 levels in patients with *S. aureus* bone  
209 infections. In mice, we demonstrated that IL-27/IL-27R signaling mediates bacterial clearance during

210 the acute phase of *S. aureus* osteomyelitis, and suppresses subsequent inflammation to prevent cytokine  
211 storm and bone osteolysis during chronic infection.

212 A remarkable finding of our study is that serum IL-27 levels were highly diagnostic of *S. aureus*  
213 osteomyelitis in patients (AUC=0.922). Previous studies have shown that serum IL-27 levels are  
214 elevated in sepsis patients, indicating its potential as a diagnostic biomarker of sepsis [14-18, 39]. A  
215 single-center prospective study demonstrated that serum IL-27 levels could be utilized to achieve AUCs  
216 of 0.75 in patients with sepsis [16]. Though IL-27 levels immediately following septic death were 60-  
217 fold higher in patients compared to uninfected patients, we couldn't perform AUC calculations due to  
218 the low number of septic death patients. Nonetheless, our study indicates that IL-27 could be a  
219 diagnostic marker of *S. aureus* osteomyelitis, and more extensive patient cohort studies are required to  
220 formally assess its diagnostic potential.

221 Systemic IL-27 delivery led to amelioration of surgical site soft tissue infection and peri-implant  
222 bone loss during the establishment of *S. aureus* osteomyelitis. However, the bacterial loads on the  
223 implant or bone were not affected by IL-27 delivery underscoring the ability of *S. aureus* to invade deep  
224 within the immune-privileged environment of bone [40]. Interestingly, reduction in abscess formation  
225 and bone osteolysis was not observed in IL-27 receptor  $\alpha$  knock-out mice, suggesting a direct role of IL-  
226 27/IL-27R signaling on immune and bone cell functions. Similarly, Wang et al. showed that  
227 administration of recombinant IL-27 improved bacterial clearance and host survival in a rodent model of  
228 *Clostridium difficile* infection colitis [41]. Contrastingly, other studies have observed that blockade of  
229 IL-27 worsened the severity of sepsis-induced myocardial dysfunction in an endotoxic shock syndrome  
230 murine model [42]. Collectively, these studies highlight the diverse effects of IL-27 on various bacterial  
231 infections.

232 Transcriptome analyses of the *S. aureus* infected tibia treated with rAAV-IL-27 revealed that IL-  
233 27 is a biphasic cytokine activating pro-inflammatory pathways early during *S. aureus* osteomyelitis and  
234 suppressing them late during the chronic phase. From these observations, it is conceivable that IL-27

235 contributes to time-dependent changes in host immunity from acute to chronic *S. aureus* osteomyelitis.  
236 A recent study, using a murine intra-femur osteomyelitis model, demonstrated similar time-dependent  
237 changes in host response during *S. aureus* osteomyelitis using gene expression analyses [43]. We also  
238 revealed that IL-23, Th17 activation, IL-17 signaling, and pro-inflammatory IL-21 were up-regulated  
239 during early *S. aureus* infection. Collectively, these pathways contribute to the expansion of Th17 cells  
240 and induction of Th17-mediated immunity, which are crucial to host defense against bacterial infections  
241 [44, 45]. However, excessive or prolonged Th17 responses due to chronic infection cause tissue damage  
242 and autoimmune diseases [46-48]. In addition to thwarting immune responses, we observed that  
243 systemic IL-27 administration suppresses inflammatory osteoclasts to prevent bone damage during the  
244 chronic phase of *S. aureus* osteomyelitis. This is consistent with the known effects of IL-27 on inhibition  
245 of osteoclastogenesis [49-52]. Collectively, these studies add to the growing body of IL-27 literature  
246 with reported pro-inflammatory and anti-inflammatory effects on various immune cells [24, 29, 30, 53-  
247 58].

248 Here, we propose a schematic model of IL-27-mediated immune homeostasis during *S. aureus*  
249 osteomyelitis (**Fig. 7**). IL-27 promotes host immune reaction against *S. aureus* osteomyelitis by  
250 regulating a diverse set of immunostimulatory and immunosuppressive pathways in a time-dependent  
251 manner. At the onset of *S. aureus* osteomyelitis, IL-27 promotes the production of pro-inflammatory  
252 cytokines [29, 30, 56-58], leading to enhanced bacterial killing by macrophages and neutrophils. In  
253 contrast, at later stages of the infection, IL-27 inhibits the production of pro-inflammatory cytokines [24,  
254 53-55] and osteoclastogenesis [49-52] to prevent cytokine storm and osteolysis. The proposed IL-27  
255 mediated immune homeostasis model is preliminary, and warrants several further investigations. Firstly,  
256 we need to examine the immune cell repertoire in the bone marrow niche that causes IL-27/IL-27R-  
257 mediated effects during *S. aureus* osteomyelitis over time. Secondly, we need to understand IL-27's role  
258 in preventing cytokine storm and internal organ tissue damage during chronic *S. aureus* osteomyelitis in  
259 a more relevant osteomyelitis sepsis murine model. Humanized mice, which are more susceptible to

260 MRSA osteomyelitis-induced sepsis, may be better suited for these studies [59]. Finally, we need to  
261 assess how systemic IL-27 inhibits bone osteolysis by suppressing RANKL-mediated  
262 osteoclastogenesis. These studies will further our understanding of IL-27/IL-27R signaling during *S.*  
263 *aureus* osteomyelitis.

264

## 265 **Materials and Methods**

### 266 Bacterial strains

267 Methicillin-resistant *S. aureus* (USA300 LAC) was used for all in vitro experiments, and a  
268 bioluminescent strain of USA300 (USA300 LAC::lux) was used for all in vivo experiments as  
269 previously described [32-34, 36, 59].

### 270 Ethics Statement and Patient Enrollment

271 Serum samples were collected from *S. aureus* osteomyelitis patients (n=23) and uninfected patients  
272 undergoing elective total joint replacement (n=10). Additionally, serum samples were collected  
273 immediately post-mortem in patients that succumbed to *S. aureus* osteomyelitis sepsis (n=5). All  
274 recruited patients were either part of an international biospecimen registry (AO Trauma Clinical Priority  
275 Program (CPP) Bone Infection Registry) [60] or clinical studies conducted at the Virginia  
276 Commonwealth University. Patients were recruited with local IRB approvals at various institutions, and  
277 patient information was collected in a REDCap database managed by AO Trauma and VCU data  
278 management administrators. Laboratory investigators had access only to de-identified clinical data,  
279 which was provided on request by the data management teams. All ex vivo and in vivo mouse infection  
280 studies were performed at the University of Rochester in accordance with protocols approved by the  
281 Institutional Animal Care and Use Committee at the University.

### 282 Luminex-based cytokine measurements

283 Serum IL-27 levels were determined in patients via Luminex assay using the Milliplex xMAP Multiplex  
284 Assay (MilliporeSigma) according to the manufacturer's instructions. Primary bone marrow-derived

285 murine macrophages (BMDMs) were pretreated with PBS or murine IL-27 (50 ng/ml from BioLegend)  
286 for 24 hours and then infected with *S. aureus* at MOI = 10 in the presence or absence of murine IL-27  
287 (50 ng/ml) for 24 hours. Subsequently, the cell culture supernatants were harvested from these cells to  
288 measure the following cytokines using a multiarray Milliplex xMAP murine cytokine Magnetic Bead  
289 Panel according to manufacturer's instructions: CD40L, GM-CSF, IFN- $\gamma$ , IL-1 $\beta$ , IL-2, IL-4, IL-5, IL-6,  
290 IL-10, IL-13, IL-15, IL-17A, IL-17F, IL-21, IL-22, IL-23, IFN- $\lambda$ 3/IL-28B, IL-31, IL-33, MIP-  
291 3 $\alpha$ /CCL20, TNF- $\alpha$ , and TNF- $\beta$ .

### 292 *In vitro* IL-27 induction assay in macrophages

293 Primary BMDMs from 12-week-old C57BL/6 mice (Jackson Laboratory) were isolated from femur and  
294 tibia. After dissection of the femur and tibia from mice, bones were washed in RPMI + 10% FBS, 1%  
295 HEPES, and 1% anti-microbial/anti-mycotic (R10) media before disinfection using 70% ethanol. After  
296 disinfection, the long bones were cut on both ends, and marrow was flushed using a 23G needle and  
297 resuspended in R10 media. After spinning cells down at 500g for ten minutes, the isolated cells were  
298 resuspended in a red lysis buffer to remove red blood cells. Cells were then resuspended again in R10  
299 media with mouse colony-stimulating factor (M-CSF) (25ng/mL) and plated at  $5 \times 10^6$  cells/plate for 6  
300 days. Subsequently, BMDMs were differentiated with PBS, murine IFN- $\gamma$  (50 ng/ml from PeproTech) or  
301 murine IL-4 (20 ng/ml from PeproTech) in R10 for 24 hours to generate M0, M1, and M2 cells  
302 respectively [61]. These cells were then infected with *S. aureus* USA300 at MOI = 10 for 24 hours, and  
303 subsequently, the cell culture supernatant was harvested to examine IL-27 secretion using the Mouse IL-  
304 27 Uncoated ELISA kit (Invitrogen).

### 305 *Reactive nitrogen species induction in murine macrophages*

306 Murine BMDMs were pretreated with PBS or murine IL-27 (50 ng/ml from Biolegend) for 24 hours,  
307 and then stimulated with or without LPS (100ng/ml from MilliporeSigma) to induce reactive nitrogen  
308 species production [62], which is important for host defense against bacterial infection [63]. Stimulation  
309 experiments were performed on BMDMs with or without murine IL-27 (50 ng/ml) for 24 hours after

310 pretreatment. Subsequently, nitrite concentrations in cell culture supernatant were determined via Griess  
311 reaction assay kit (R&D Systems).

### 312 Transwell Chemotaxis assay

313 HL-60 cells (ATCC) were differentiated into granulocytes using 100mM dimethylformamide (DMF)  
314 (MilliporeSigma), placed on top of Boyden chambers, and chemotaxis assay was performed according  
315 to manufacturer's protocol (MilliporeSigma QCM™ Chemotaxis 5 µm 24-Well Cell Migration Assay  
316 kit). Briefly,  $1 \times 10^6$  cells/chamber were subjected to chemotaxis in RPMI media with or without the  
317 chemoattractant (human IL-27 (500 ng/ml from PeproTech) or N-formyl-methionyl-leucyl-  
318 phenylalanine (fMLP) (800 ng/mL from MilliporeSigma) as positive control)) placed below the  
319 chamber, and incubated for 1 hour at 37 °C. Post incubation, cell migration from the chambers was  
320 enumerated as relative fluorescence units (RFUs) according to the manufacturer's instructions.

### 321 Recombinant IL-27-expressing adeno-associated virus vector (rAAV-IL-27) administration

322 To get sustained exogenous IL-27 expression, mice were subjected to intramuscular administration of  
323 recombinant murine IL-27-expressing AAV ( $0.5 \times 10^{12}$  genome copies/mouse, Vector Biolabs) 7 days  
324 prior to *S. aureus* septic surgery [64]. Mice intramuscularly infected with AAV expressing recombinant  
325 GFP ( $0.5 \times 10^{12}$  genome copies/ mouse, Vector Biolabs) were used as controls.

### 326 Implant-associated MRSA osteomyelitis in mice

327 C57BL/6 and IL-27Ra deficient mice (IL-27Ra<sup>-/-</sup>) in the C57BL/6 background used in the study were  
328 purchased from Jackson Laboratories and maintained at the University of Rochester animal facilities.  
329 All in vivo *S. aureus* challenge experiments in mice utilized our well-validated transtibial implant-  
330 associated osteomyelitis model [32-34, 36, 59]. Briefly, L-shaped stainless-steel implant was  
331 contaminated with USA300 LAC ( $5.0 \times 10^5$  CFU/mL) grown overnight, and surgically implanted into  
332 the tibia of 8-week-old female C57BL/6 mice from the medial to the lateral side. Longitudinal body  
333 weight change and bioluminescent intensity at infection site were evaluated, and terminal assessment of  
334 CFU (implant, surgical site soft tissue and tibia), peri-implant osteolysis (high-resolution µCT imaging),

335 biofilm formation on the implant (Zeiss Auriga SEM imaging), and histopathology were performed on  
336 day 14 post-septic surgery as described previously [32-34, 36, 59]. Murine infection studies were  
337 performed three independent times, and the resulting data was pooled from these experiments.

338 RNA sequencing of MRSA infected tibia

339 C57BL/6 were intramuscularly injected with rAAV-IL-27 or rAAV-GFP and then challenged with an *S.*  
340 *aureus* contaminated transtibial implant as described above. Infected tibiae were collected on days 1, 3,  
341 7, and 14 post-surgery for RNA sequencing. Tibiae were pulverized in liquid nitrogen (-196 °C) and  
342 homogenized using Bullet Blender Gold (Next Advance). Collection of Total RNA from homogenized  
343 tibia was performed using TRIzol extraction (ThermoFisherScientific) and RNeasy Mini Kits (Qiagen).  
344 Contaminating genomic DNA was removed using TURBO DNase (ThermoFisherScientific). The  
345 TruSeq Stranded Total RNA Library Prep Gold (Illumina) was utilized for next-generation sequencing  
346 library preparation per the manufacturer's instructions. The libraries were sequenced with the Illumina  
347 NovaSeq6000 platform (Illumina). Quality filtering and adapter removal were performed by fastp  
348 version 0.20.0 [65] using the following parameters: "--in1 ../\$(SAMPLE)\_R1.fastq.gz --out1  
349 clt\_\$(SAMPLE)\_R1.fastq.gz --length\_required 35 --cut\_front\_window\_size 1 --cut\_front\_mean\_quality  
350 13 --cut\_front --cut\_tail\_window\_size 1 --cut\_tail\_mean\_quality 13 --cut\_tail -w 8 -y -r -j  
351 \$(SAMPLE)\_fastp.json". The remaining high quality processed reads were then mapped to the *Mus*  
352 *musculus* genome reference (GRCm38.p6) with STAR version 2.7.0f [66] using the following  
353 parameters: "--twopassMode Basic --runMode alignReads --genomeDir \$(GENOME) --readFilesIn  
354 \$(SAMPLE) --outSAMtype BAM Unsorted --outSAMstrandField intronMotif --outFilterIntronMotifs  
355 RemoveNoncanonical". The mapped reads were counted within the GRCm38.p6 gene annotations using  
356 the featureCounts read quantification program in Subread version 1.6.4 [67]. Then, the differential  
357 expression analyses and data normalization were performed using DESeq2 version 1.22.1 [68] within  
358 the R version 3.5.1 with a p-value threshold of 0.05 on each set of raw expression measure. Subsequent  
359 bioinformatics analyses including Canonical Pathway Analysis and Regulator Effect Network Analysis

360 were performed using Ingenuity Pathway Analysis (IPA; Qiagen) for each time-point. All generated  
361 sequence data have been submitted to Gene Expression Omnibus with accession number GSE168896.

362 *Statistics*

363 For statistical analyses, the non-parametric Kruskal-Wallis test, one-way ANOVA, repeated measures  
364 two-way ANOVA, and unpaired student's t-test were utilized to assess significance between  
365 experimental groups. Data were presented as mean  $\pm$  standard deviation. A *p* value less than 0.05 was  
366 considered significant.



## 367 **Acknowledgments**

368 The authors would also like to thank Drs. Chad Galloway and Elysia A. Masters for their technical  
369 assistance. The authors would like to thank the Electron Microscope Shared Resource Laboratory,  
370 Genomics Research Center, and the Histology, Biochemistry, and Molecular Imaging Core in the Center  
371 for Musculoskeletal Research at the University of Rochester Medical Center.

372

## 373 **Funding**

374 This work was supported by NIH NIAMS P30 AR069655 pilot grant (GM) with additional support from  
375 NIH NIAMS P50 AR072000 (EMS), P30 AR069655 (EMS), and AO Trauma Clinical Priority Program  
376 (EMS, SLK).

377

## 378 **Conflict of interest statement**

379 The authors have declared that no conflict of interest exists.

380

## 381 **Data availability**

382 All RNA sequence data have been submitted to the Gene Expression Omnibus with accession number  
383 GSE168896.

## 384 References

- 385 1. Schwarz EM, Parvizi J, Gehrke T, Aiyer A, Battenberg A, Brown SA, et al. 2018 International  
386 Consensus Meeting on Musculoskeletal Infection: Research Priorities from the General Assembly  
387 Questions. *J Orthop Res*. 2019;37(5):997-1006. Epub 2019/04/13. doi: 10.1002/jor.24293. PubMed  
388 PMID: 30977537.
- 389 2. Tande AJ, Patel R. Prosthetic joint infection. *Clin Microbiol Rev*. 2014;27(2):302-45. Epub  
390 2014/04/04. doi: 10.1128/CMR.00111-13. PubMed PMID: 24696437; PubMed Central PMCID:  
391 PMCPMC3993098.
- 392 3. Stulberg JJ, Delaney CP, Neuhauser DV, Aron DC, Fu P, Koroukian SM. Adherence to surgical  
393 care improvement project measures and the association with postoperative infections. *Jama*.  
394 2010;303(24):2479-85. Epub 2010/06/24. doi: 10.1001/jama.2010.841. PubMed PMID: 20571014.
- 395 4. Kates SL, Tornetta P, 3rd. Commentary on Secondary Fracture Prevention: Consensus Clinical  
396 Recommendations From a Multistakeholder Coalition Originally Published in the *Journal of Bone and*  
397 *Mineral Research*. *J Orthop Trauma*. 2020;34(4):221. Epub 2020/03/21. doi:  
398 10.1097/BOT.0000000000001742. PubMed PMID: 32195890.
- 399 5. Goodson KM, Kee JR, Edwards PK, Novack AJ, Stambough JB, Siegel ER, et al. Streamlining  
400 Hospital Treatment of Prosthetic Joint Infection. *J Arthroplasty*. 2020;35(3S):S63-S8. Epub 2020/02/13.  
401 doi: 10.1016/j.arth.2019.10.056. PubMed PMID: 32046835.
- 402 6. Depypere M, Morgenstern M, Kuehl R, Senneville E, Moriarty TF, Obremskey WT, et al.  
403 Pathogenesis and management of fracture-related infection. *Clin Microbiol Infect*. 2020;26(5):572-8.  
404 Epub 2019/08/26. doi: 10.1016/j.cmi.2019.08.006. PubMed PMID: 31446152.
- 405 7. Govaert GAM, Kuehl R, Atkins BL, Trampuz A, Morgenstern M, Obremskey WT, et al.  
406 Diagnosing Fracture-Related Infection: Current Concepts and Recommendations. *J Orthop Trauma*.  
407 2020;34(1):8-17. Epub 2019/12/20. doi: 10.1097/BOT.0000000000001614. PubMed PMID: 31855973;  
408 PubMed Central PMCID: PMCPMC6903359.
- 409 8. Kandel CE, Jenkinson R, Daneman N, Backstein D, Hansen BE, Muller MP, et al. Predictors of  
410 Treatment Failure for Hip and Knee Prosthetic Joint Infections in the Setting of 1- and 2-Stage  
411 Exchange Arthroplasty: A Multicenter Retrospective Cohort. *Open Forum Infect Dis*.  
412 2019;6(11):ofz452. Epub 2019/11/19. doi: 10.1093/ofid/ofz452. PubMed PMID: 31737739; PubMed  
413 Central PMCID: PMCPMC6847009.
- 414 9. Masters EA, Trombetta RP, de Mesy Bentley KL, Boyce BF, Gill AL, Gill SR, et al. Evolving  
415 concepts in bone infection: redefining "biofilm", "acute vs. chronic osteomyelitis", "the immune  
416 proteome" and "local antibiotic therapy". *Bone Res*. 2019;7:20. doi: 10.1038/s41413-019-0061-z.  
417 PubMed PMID: 31646012; PubMed Central PMCID: PMCPMC6804538.
- 418 10. Kaplan SL. Recent lessons for the management of bone and joint infections. *J Infect*. 2014;68  
419 Suppl 1:S51-6. Epub 2013/10/15. doi: 10.1016/j.jinf.2013.09.014. PubMed PMID: 24119927.
- 420 11. Assis LM, Nedeljkovic M, Dessen A. New strategies for targeting and treatment of multi-drug  
421 resistant *Staphylococcus aureus*. *Drug Resist Updat*. 2017;31:1-14. Epub 2017/09/05. doi:  
422 10.1016/j.drug.2017.03.001. PubMed PMID: 28867240.
- 423 12. Weigelt JA, Lipsky BA, Tabak YP, Derby KG, Kim M, Gupta V. Surgical site infections:  
424 Causative pathogens and associated outcomes. *Am J Infect Control*. 2010;38(2):112-20. Epub  
425 2009/11/06. doi: 10.1016/j.ajic.2009.06.010. PubMed PMID: 19889474.
- 426 13. van Hal SJ, Jensen SO, Vaska VL, Espedido BA, Paterson DL, Gosbell IB. Predictors of  
427 mortality in *Staphylococcus aureus* Bacteremia. *Clinical microbiology reviews*. 2012;25(2):362-86.  
428 Epub 2012/04/12. doi: 10.1128/CMR.05022-11. PubMed PMID: 22491776; PubMed Central PMCID:  
429 PMCPMC3346297.

- 430 14. Wong HR, Lindsell CJ, Lahni P, Hart KW, Gibot S. Interleukin 27 as a sepsis diagnostic  
431 biomarker in critically ill adults. *Shock*. 2013;40(5):382-6. doi: 10.1097/SHK.0b013e3182a67632.  
432 PubMed PMID: 23903853; PubMed Central PMCID: PMCPMC3800476.
- 433 15. Wong HR, Liu KD, Kangelaris KN, Lahni P, Calfee CS. Performance of interleukin-27 as a  
434 sepsis diagnostic biomarker in critically ill adults. *J Crit Care*. 2014;29(5):718-22. doi:  
435 10.1016/j.jcrc.2014.04.004. PubMed PMID: 24848949; PubMed Central PMCID: PMCPMC4141017.
- 436 16. Hanna WJ, Berrens Z, Langner T, Lahni P, Wong HR. Interleukin-27: a novel biomarker in  
437 predicting bacterial infection among the critically ill. *Crit Care*. 2015;19:378. doi: 10.1186/s13054-015-  
438 1095-2. PubMed PMID: 26514771; PubMed Central PMCID: PMCPMC4627377.
- 439 17. He Y, Du WX, Jiang HY, Ai Q, Feng J, Liu Z, et al. Multiplex Cytokine Profiling Identifies  
440 Interleukin-27 as a Novel Biomarker For Neonatal Early Onset Sepsis. *Shock*. 2017;47(2):140-7. doi:  
441 10.1097/SHK.0000000000000753. PubMed PMID: 27648693.
- 442 18. Jacobs L, Berrens Z, Stenson EK, Zackoff M, Danziger-Isakov L, Lahni P, et al. Interleukin-27  
443 as a candidate diagnostic biomarker for bacterial infection in immunocompromised pediatric patients.  
444 *PLoS One*. 2018;13(11):e0207620. doi: 10.1371/journal.pone.0207620. PubMed PMID: 30475852;  
445 PubMed Central PMCID: PMCPMC6261028.
- 446 19. Wong HR CN, Hall M, Allen GL, Thomas NJ, Freishtat RJ, Anas N, Meyer K, Checchia PA,  
447 Lin R, Bigham MT, Sen A, Nowak J, Quasney M, Henricksen JW, Chopra A, Banschbach S, Beckman  
448 E, Harmon K, Lahni P, Shanley TP. Interleukin-27 is a novel candidate diagnostic biomarker for  
449 bacterial infection in critically ill children. *Crit Care*. 2012;16(5):R213. doi: 10.1186/cc11847.
- 450 20. Yoshida H, Hunter CA. The immunobiology of interleukin-27. *Annu Rev Immunol*.  
451 2015;33:417-43. Epub 2015/04/12. doi: 10.1146/annurev-immunol-032414-112134. PubMed PMID:  
452 25861977.
- 453 21. Hunter CA. New IL-12-family members: IL-23 and IL-27, cytokines with divergent functions.  
454 *Nature reviews Immunology*. 2005;5(7):521-31. Epub 2005/07/07. doi: 10.1038/nri1648. PubMed  
455 PMID: 15999093.
- 456 22. Pflanz S TJ, Cheung J, Rosales R, Kanzler H, Gilbert J, Hibbert L,, Churakova T TM, Vaisberg  
457 E, Blumenschein WM, Mattson JD, Wagner JL, To W, , Zurawski S MT, Gorman DM, Bazan JF, de  
458 Waal Malefyt R, Rennick D,, RA. K. IL-27, a heterodimeric cytokine composed of EB13 and p28  
459 protein, induces proliferation of naive CD4+ T cells. *Immunity*. 2002;16(6):779-90. doi: 10.1016/s1074-  
460 7613(02)00324-2
- 461 23. Morita YM, E.A.; Schwarz, E.M.; Muthukrishnan G. Interleukin-27 and its diverse effects on  
462 bacterial infections. *Frontiers in Immunology*. 2021;(In press).
- 463 24. Diveu C, McGeachy MJ, Boniface K, Stumhofer JS, Sathe M, Joyce-Shaikh B, et al. IL-27  
464 blocks RORc expression to inhibit lineage commitment of Th17 cells. *J Immunol*. 2009;182(9):5748-56.  
465 Epub 2009/04/22. doi: 10.4049/jimmunol.0801162. PubMed PMID: 19380822.
- 466 25. Hall AO, Beiting DP, Tato C, John B, Oldenhove G, Lombana CG, et al. The cytokines  
467 interleukin 27 and interferon-gamma promote distinct Treg cell populations required to limit infection-  
468 induced pathology. *Immunity*. 2012;37(3):511-23. Epub 2012/09/18. doi:  
469 10.1016/j.immuni.2012.06.014. PubMed PMID: 22981537; PubMed Central PMCID:  
470 PMCPMC3477519.
- 471 26. Cao J, Xu F, Lin S, Song Z, Zhang L, Luo P, et al. IL-27 controls sepsis-induced impairment of  
472 lung antibacterial host defence. *Thorax*. 2014;69(10):926-37. Epub 2014/07/31. doi: 10.1136/thoraxjnl-  
473 2014-205777. PubMed PMID: 25074706.
- 474 27. Robinson KM, Lee B, Scheller EV, Mandalapu S, Enelow RI, Kolls JK, et al. The role of IL-27  
475 in susceptibility to post-influenza *Staphylococcus aureus* pneumonia. *Respir Res*. 2015;16:10. Epub  
476 2015/02/06. doi: 10.1186/s12931-015-0168-8. PubMed PMID: 25651926; PubMed Central PMCID:  
477 PMCPMC4324414.

- 478 28. Seita J, Asakawa M, Ooehara J, Takayanagi S, Morita Y, Watanabe N, et al. Interleukin-27  
479 directly induces differentiation in hematopoietic stem cells. *Blood*. 2008;111(4):1903-12. doi:  
480 10.1182/blood-2007-06-093328. PubMed PMID: 18042804.
- 481 29. Pflanz S, Hibbert L, Mattson J, Rosales R, Vaisberg E, Bazan JF, et al. WSX-1 and glycoprotein  
482 130 constitute a signal-transducing receptor for IL-27. *J Immunol*. 2004;172(4):2225-31. doi:  
483 10.4049/jimmunol.172.4.2225. PubMed PMID: 14764690.
- 484 30. Guzzo C, Che Mat NF, Gee K. Interleukin-27 induces a STAT1/3- and NF-kappaB-dependent  
485 proinflammatory cytokine profile in human monocytes. *J Biol Chem*. 2010;285(32):24404-11. doi:  
486 10.1074/jbc.M110.112599. PubMed PMID: 20519510; PubMed Central PMCID: PMCPMC2915676.
- 487 31. Lucas S, Ghilardi N, Li J, de Sauvage FJ. IL-27 regulates IL-12 responsiveness of naive CD4+ T  
488 cells through Stat1-dependent and -independent mechanisms. *Proc Natl Acad Sci U S A*.  
489 2003;100(25):15047-52. doi: 10.1073/pnas.2536517100. PubMed PMID: 14657353; PubMed Central  
490 PMCID: PMCPMC299900.
- 491 32. Nishitani K, Sutipornpalangkul W, de Mesy Bentley KL, Varrone JJ, Bello-Irizarry SN, Ito H, et  
492 al. Quantifying the natural history of biofilm formation in vivo during the establishment of chronic  
493 implant-associated *Staphylococcus aureus* osteomyelitis in mice to identify critical pathogen and host  
494 factors. *J Orthop Res*. 2015;33(9):1311-9. doi: 10.1002/jor.22907. PubMed PMID: 25820925; PubMed  
495 Central PMCID: PMCPMC4529770.
- 496 33. Masters EA, de Mesy Bentley KL, Gill AL, Hao SP, Galloway CA, Salminen AT, et al.  
497 Identification of Penicillin Binding Protein 4 (PBP4) as a critical factor for *Staphylococcus aureus* bone  
498 invasion during osteomyelitis in mice. *PLoS Pathog*. 2020;16(10):e1008988. doi:  
499 10.1371/journal.ppat.1008988. PubMed PMID: 33091079; PubMed Central PMCID:  
500 PMCPMC7608983 silicon-based technologies.
- 501 34. Nishitani K, Ishikawa M, Morita Y, Yokogawa N, Xie C, de Mesy Bentley KL, et al. IsdB  
502 antibody-mediated sepsis following *S. aureus* surgical site infection. *JCI Insight*. 2020;5(19). doi:  
503 10.1172/jci.insight.141164. PubMed PMID: 33004694; PubMed Central PMCID: PMCPMC7566716.
- 504 35. Masters EA, Hao SP, Kenney HM, Morita Y, Galloway CA, de Mesy Bentley KL, et al. Distinct  
505 vasculotropic versus osteotropic features of *S. agalactiae* versus *S. aureus* implant-associated bone  
506 infection in mice. *J Orthop Res*. 2021;39(2):389-401. doi: 10.1002/jor.24962. PubMed PMID:  
507 33336806.
- 508 36. Varrone JJ, de Mesy Bentley KL, Bello-Irizarry SN, Nishitani K, Mack S, Hunter JG, et al.  
509 Passive immunization with anti-glucosaminidase monoclonal antibodies protects mice from implant-  
510 associated osteomyelitis by mediating opsonophagocytosis of *Staphylococcus aureus* megaclusters. *J*  
511 *Orthop Res*. 2014;32(10):1389-96. doi: 10.1002/jor.22672. PubMed PMID: 24992290; PubMed Central  
512 PMCID: PMCPMC4234088.
- 513 37. Frangieh M, McHenry A, Phillips R, Ye C, Bernier A, Laffel L, et al. IL-27: An endogenous  
514 constitutive repressor of human monocytes. *Clin Immunol*. 2020;217:108498. doi:  
515 10.1016/j.clim.2020.108498. PubMed PMID: 32531345.
- 516 38. Ivanov, II, McKenzie BS, Zhou L, Tadokoro CE, Lepelley A, Lafaille JJ, et al. The orphan  
517 nuclear receptor RORgammat directs the differentiation program of proinflammatory IL-17+ T helper  
518 cells. *Cell*. 2006;126(6):1121-33. doi: 10.1016/j.cell.2006.07.035. PubMed PMID: 16990136.
- 519 39. Fan J, Zhang YC, Zheng DF, Zhang M, Liu H, He M, et al. IL-27 is elevated in sepsis with acute  
520 hepatic injury and promotes hepatic damage and inflammation in the CLP model. *Cytokine*.  
521 2020;127:154936. doi: 10.1016/j.cyto.2019.154936. PubMed PMID: 31786500.
- 522 40. Muthukrishnan G, Masters EA, Daiss JL, Schwarz EM. Mechanisms of Immune Evasion and  
523 Bone Tissue Colonization That Make *Staphylococcus aureus* the Primary Pathogen in Osteomyelitis.  
524 *Curr Osteoporos Rep*. 2019. Epub 2019/11/14. doi: 10.1007/s11914-019-00548-4. PubMed PMID:  
525 31721069.

- 526 41. Wang L, Cao J, Li C, Zhang L. IL-27/IL-27 Receptor Signaling Provides Protection in  
527 Clostridium difficile-Induced Colitis. *J Infect Dis*. 2018;217(2):198-207. doi: 10.1093/infdis/jix581.  
528 PubMed PMID: 29140433.
- 529 42. Gao F, Yang YZ, Feng XY, Fan TT, Jiang L, Guo R, et al. Interleukin-27 is elevated in sepsis-  
530 induced myocardial dysfunction and mediates inflammation. *Cytokine*. 2016;88:1-11. doi:  
531 10.1016/j.cyto.2016.08.006. PubMed PMID: 27525353.
- 532 43. Lin Y, Su J, Wang Y, Xu D, Zhang X, Yu B. mRNA transcriptome analysis of bone in a mouse  
533 model of implant-associated Staphylococcus aureus osteomyelitis. *Infect Immun*. 2021. doi:  
534 10.1128/IAI.00814-20. PubMed PMID: 33619031.
- 535 44. Milner JD, Brenchley JM, Laurence A, Freeman AF, Hill BJ, Elias KM, et al. Impaired T(H)17  
536 cell differentiation in subjects with autosomal dominant hyper-IgE syndrome. *Nature*.  
537 2008;452(7188):773-6. doi: 10.1038/nature06764. PubMed PMID: 18337720; PubMed Central PMCID:  
538 PMCPMC2864108.
- 539 45. Marques JM, Rial A, Munoz N, Pellay FX, Van Maele L, Leger H, et al. Protection against  
540 Streptococcus pneumoniae serotype 1 acute infection shows a signature of Th17- and IFN-gamma-  
541 mediated immunity. *Immunobiology*. 2012;217(4):420-9. doi: 10.1016/j.imbio.2011.10.012. PubMed  
542 PMID: 22204818.
- 543 46. Lubberts E KM, van den Berg WB. The role of T-cell interleukin-17 in conducting destructive  
544 arthritis: lessons from animal models. *Arthritis Res Ther*. 2005;7(1):29-37. doi: 10.1186/ar1478).
- 545 47. Eastaff-Leung N, Mabarrack N, Barbour A, Cummins A, Barry S. Foxp3+ regulatory T cells,  
546 Th17 effector cells, and cytokine environment in inflammatory bowel disease. *J Clin Immunol*.  
547 2010;30(1):80-9. doi: 10.1007/s10875-009-9345-1. PubMed PMID: 19936899.
- 548 48. Roeleveld DM, Koenders MI. The role of the Th17 cytokines IL-17 and IL-22 in Rheumatoid  
549 Arthritis pathogenesis and developments in cytokine immunotherapy. *Cytokine*. 2015;74(1):101-7. doi:  
550 10.1016/j.cyto.2014.10.006. PubMed PMID: 25466295.
- 551 49. Kamiya S, Nakamura C, Fukawa T, Ono K, Ohwaki T, Yoshimoto T, et al. Effects of IL-23 and  
552 IL-27 on osteoblasts and osteoclasts: inhibitory effects on osteoclast differentiation. *J Bone Miner  
553 Metab*. 2007;25(5):277-85. doi: 10.1007/s00774-007-0766-8. PubMed PMID: 17704992.
- 554 50. Shukla P, Mansoori MN, Kakaji M, Shukla M, Gupta SK, Singh D. Interleukin 27 (IL-27)  
555 Alleviates Bone Loss in Estrogen-deficient Conditions by Induction of Early Growth Response-2 Gene.  
556 *J Biol Chem*. 2017;292(11):4686-99. doi: 10.1074/jbc.M116.764779. PubMed PMID: 28130449;  
557 PubMed Central PMCID: PMCPMC5377783.
- 558 51. Li X LW, Hu J, Chen Y, Yu T, Yang J, Dong S, Tian X, Sun L. Interleukin-27 prevents LPS-  
559 induced inflammatory osteolysis by inhibiting osteoclast formation and function. *Am J Transl Res*.  
560 2019;11(3):1154-1169.; PubMed Central PMCID: PMCPMC6456512.
- 561 52. Terkawi MA, Kadoya K, Takahashi D, Tian Y, Hamasaki M, Matsumae G, et al. Identification  
562 of IL-27 as potent regulator of inflammatory osteolysis associated with vitamin E-blended ultra-high  
563 molecular weight polyethylene debris of orthopedic implants. *Acta Biomater*. 2019;89:242-51. doi:  
564 10.1016/j.actbio.2019.03.028. PubMed PMID: 30880234.
- 565 53. Holscher C, Holscher A, Ruckerl D, Yoshimoto T, Yoshida H, Mak T, et al. The IL-27 receptor  
566 chain WSX-1 differentially regulates antibacterial immunity and survival during experimental  
567 tuberculosis. *J Immunol*. 2005;174(6):3534-44. doi: 10.4049/jimmunol.174.6.3534. PubMed PMID:  
568 15749890.
- 569 54. Owaki T, Asakawa M, Kamiya S, Takeda K, Fukai F, Mizuguchi J, et al. IL-27 suppresses  
570 CD28-mediated [correction of medicated] IL-2 production through suppressor of cytokine signaling 3. *J  
571 Immunol*. 2006;176(5):2773-80. doi: 10.4049/jimmunol.176.5.2773. PubMed PMID: 16493033.
- 572 55. Karakhanova S, Bedke T, Enk AH, Mahnke K. IL-27 renders DC immunosuppressive by  
573 induction of B7-H1. *J Leukoc Biol*. 2011;89(6):837-45. doi: 10.1189/jlb.1209788. PubMed PMID:  
574 21345970.

- 575 56. Schneider R, Yaneva T, Beauseigle D, El-Khoury L, Arbour N. IL-27 increases the proliferation  
576 and effector functions of human naive CD8<sup>+</sup> T lymphocytes and promotes their development into Tc1  
577 cells. *Eur J Immunol.* 2011;41(1):47-59. doi: 10.1002/eji.201040804. PubMed PMID: 21182076.
- 578 57. Petes C, Odoardi N, Plater SM, Martin NL, Gee K. IL-27 amplifies cytokine responses to Gram-  
579 negative bacterial products and *Salmonella typhimurium* infection. *Sci Rep.* 2018;8(1):13704. doi:  
580 10.1038/s41598-018-32007-y. PubMed PMID: 30209294; PubMed Central PMCID:  
581 PMC6135775.
- 582 58. Choi YH, Lim EJ, Kim SW, Moon YW, Park KS, An HJ. IL-27 enhances IL-15/IL-18-mediated  
583 activation of human natural killer cells. *J Immunother Cancer.* 2019;7(1):168. doi: 10.1186/s40425-019-  
584 0652-7. PubMed PMID: 31277710; PubMed Central PMCID: PMC6612093.
- 585 59. Muthukrishnan G, Wallimann A, Rangel-Moreno J, Bentley KLdM, Hildebrand M, Mys K, et al.  
586 Humanized Mice Exhibit Exacerbated Abscess Formation and Osteolysis During the Establishment of  
587 Implant-Associated *Staphylococcus aureus* Osteomyelitis. *Frontiers in Immunology.* 2021;12(809). doi:  
588 10.3389/fimmu.2021.651515.
- 589 60. Morgenstern M, Erichsen C, Militz M, Xie Z, Peng J, Stannard J, et al. The AO trauma CPP  
590 bone infection registry: Epidemiology and outcomes of *Staphylococcus aureus* bone infection. *J Orthop*  
591 *Res.* 2020. Epub 2020/07/29. doi: 10.1002/jor.24804. PubMed PMID: 32720352.
- 592 61. Murray PJ AJ, Biswas SK, Fisher EA, Gilroy DW, Goerdts S, Gordon S, Hamilton JA, Ivashkiv  
593 LB, Lawrence T, Locati M, Mantovani A, Martinez FO, Mege JL, Mosser DM, Natoli G, Saeij JP,  
594 Schultze JL, Shirey KA, Sica A, Suttles J, Udalova I, van Ginderachter JA, Vogel SN, Wynn TA.  
595 Macrophage activation and polarization: nomenclature and experimental guidelines. *Immunity.*  
596 2014;41(1):14-20. doi: doi: 10.1016/j.immuni.2014.06.008.
- 597 62. Lu SC, Wu HW, Lin YJ, Chang SF. The essential role of Oct-2 in LPS-induced expression of  
598 iNOS in RAW 264.7 macrophages and its regulation by trichostatin A. *Am J Physiol Cell Physiol.*  
599 2009;296(5):C1133-9. doi: 10.1152/ajpcell.00031.2009. PubMed PMID: 19279235.
- 600 63. Fang FC, Vazquez-Torres A. Reactive nitrogen species in host-bacterial interactions. *Curr Opin*  
601 *Immunol.* 2019;60:96-102. doi: 10.1016/j.coi.2019.05.008. PubMed PMID: 31200187; PubMed Central  
602 PMCID: PMC6800629.
- 603 64. Zhu X, Liu Z, Liu JQ, Zhu J, Zhang J, Davis JP, et al. Systemic delivery of IL-27 by an adeno-  
604 associated viral vector inhibits T cell-mediated colitis and induces multiple inhibitory pathways in T  
605 cells. *J Leukoc Biol.* 2016;100(2):403-11. Epub 2016/04/24. doi: 10.1189/jlb.3A1215-540R. PubMed  
606 PMID: 27106672; PubMed Central PMCID: PMC64945352.
- 607 65. Chen S, Zhou Y, Chen Y, Gu J. fastp: an ultra-fast all-in-one FASTQ preprocessor.  
608 *Bioinformatics.* 2018;34(17):i884-i90. doi: 10.1093/bioinformatics/bty560. PubMed PMID: 30423086;  
609 PubMed Central PMCID: PMC6129281.
- 610 66. Dobin A, Davis CA, Schlesinger F, Drenkow J, Zaleski C, Jha S, et al. STAR: ultrafast universal  
611 RNA-seq aligner. *Bioinformatics.* 2013;29(1):15-21. doi: 10.1093/bioinformatics/bts635. PubMed  
612 PMID: 23104886; PubMed Central PMCID: PMC3530905.
- 613 67. Liao Y, Smyth GK, Shi W. The Subread aligner: fast, accurate and scalable read mapping by  
614 seed-and-vote. *Nucleic Acids Res.* 2013;41(10):e108. doi: 10.1093/nar/gkt214. PubMed PMID:  
615 23558742; PubMed Central PMCID: PMC3664803.
- 616 68. Love MI, Huber W, Anders S. Moderated estimation of fold change and dispersion for RNA-seq  
617 data with DESeq2. *Genome Biol.* 2014;15(12):550. doi: 10.1186/s13059-014-0550-8. PubMed PMID:  
618 25516281; PubMed Central PMCID: PMC4302049.
- 619

620 **Table 1. In vitro cytokine assay with *S. aureus* infected murine bone marrow derived macrophages**  
 621 **in the presence or absence of IL-27**

|                                         | <b>PBS+S.aureus infection</b> | <b>IL-27+S.aureus infection</b>          |
|-----------------------------------------|-------------------------------|------------------------------------------|
| <b>IL-1<math>\beta</math></b>           | 99.1 $\pm$ 28.7               | 90.8 $\pm$ 14.4                          |
| <b>IL-2</b>                             | 144.9 $\pm$ 2.2               | 155.2 $\pm$ 8.7                          |
| <b>IL-4</b>                             | 168.0 $\pm$ 3.3               | 174.5 $\pm$ 7.9                          |
| <b>IL-5</b>                             | 518.8 $\pm$ 9.9               | 554.4 $\pm$ 31.2                         |
| <b>IL-6</b>                             | 12595.4 $\pm$ 1263.0          | 10174.4 $\pm$ 2138.8                     |
| <b>IL-10</b>                            | 3721.7 $\pm$ 27.0             | <b>3915.8 <math>\pm</math> 129.7*</b>    |
| <b>IL-13</b>                            | 1354.3 $\pm$ 28.2             | 1397.1 $\pm$ 141.8                       |
| <b>IL-15</b>                            | 41387.8 $\pm$ 1327.2          | 42200.2 $\pm$ 2124.3                     |
| <b>IL-17A</b>                           | 747.3 $\pm$ 60.4              | 778.3 $\pm$ 61.0                         |
| <b>IL-17F</b>                           | 1079.8 $\pm$ 19.1             | 1099.1 $\pm$ 64.1                        |
| <b>IL-21</b>                            | 2279.2 $\pm$ 91.6             | <b>2439.9 <math>\pm</math> 20.0*</b>     |
| <b>IL-22</b>                            | 1827.6 $\pm$ 61.4             | 1859.3 $\pm$ 84.1                        |
| <b>IL-23</b>                            | 7492.5 $\pm$ 182.3            | 8042.7 $\pm$ 142.0                       |
| <b>IL-31</b>                            | 2454.4 $\pm$ 94.1             | <b>2672.7 <math>\pm</math> 25.3**</b>    |
| <b>IL-33</b>                            | 10965.5 $\pm$ 125.8           | 11595.4 $\pm$ 701.2                      |
| <b>IFN-<math>\gamma</math></b>          | 164.3 $\pm$ 3.5               | 167.5 $\pm$ 8.8                          |
| <b>IFN-<math>\lambda</math>3/IL-28B</b> | 472.9 $\pm$ 13.8              | 488.4 $\pm$ 37.1                         |
| <b>TNF-<math>\alpha</math></b>          | 500.2 $\pm$ 24.4              | 482.7 $\pm$ 9.5                          |
| <b>TNF-<math>\beta</math></b>           | 87365.0 $\pm$ 1032.4          | <b>99471.3 <math>\pm</math> 5440.6**</b> |
| <b>GM-CSF</b>                           | 265.0 $\pm$ 11.1              | 281.4 $\pm$ 6.9                          |
| <b>MIP-3a/CCL20</b>                     | 5648.3 $\pm$ 247.4            | 5670.9 $\pm$ 37.3                        |
| <b>CD40L</b>                            | 9229.2 $\pm$ 87.6             | 9870.0 $\pm$ 487.6                       |

622 Data are presented mean +/- SD (pg/mL) (N=3, \*p<0.05, \*\*p< 0.01, one-way ANOVA)  
 623

624 **Figure Legends**

625 **Figure 1. IL-27 levels are elevated in patients and in mice with *S. aureus* infection. A)** Serum

626 samples were collected from healthy people (n=10), orthopaedic patients with culture confirmed *S.*

627 *aureus* bone infections (n=23), and patients who died from septic *S. aureus* osteomyelitis (n=5). Serum

628 IL-27 levels were determined via Luminex assay, and the data for each sample is presented with the

629 mean +/- SEM for the group. **B)** The Luminex data were utilized to perform a receiver operating

630 characteristic (ROC) curve, and the area under the curve (AUC) between controls and infected patients

631 is presented. Note that serum IL-27 levels are highly diagnostic of *S. aureus* osteomyelitis. The dashed

632 line represents a non-discriminatory test with equal sensitivity and specificity. In vitro cultures of **(C)**

633 RAW264.7 cells and **(D)** primary murine bone marrow-derived macrophages were differentiated with

634 PBS, IFN- $\gamma$  (50ng/ml) or IL-4 (20ng/ml) to generate M0, M1 and M2 cells respectively, and then

635 exposed to *S. aureus* USA300 (MOI = 10). These cultures were incubated for 24 hours, and IL-27 levels

636 in the supernatants were assessed via ELISA. The data from each experiment are presented with the

637 mean +/- SD for the group (n=3) (\* $p$ <0.05, \*\* $p$ <0.01, \*\*\* $p$ <0.001 \*\*\*\* $p$ <0.0001, ANOVA).

638

639 **Figure 2. Systemic IL-27 ameliorates surgical site soft tissue infection and osteolysis during *S.***

640 ***aureus* implant-associated osteomyelitis. (A)** 8-week-old female C57BL/6 mice received  $0.5 \times 10^{12}$

641 genome copies/mouse of rAAV-IL-27 (n=3) or rAAV-GFP (control, n=5) via intramuscular injection,

642 and serum samples were collected longitudinally to assess IL-27 levels via ELISA. Exogenous IL-27

643 levels in sera are presented as the mean +/- SD. **(B-F)** A separate cohort of these mice were

644 intramuscularly injected with rAAV-IL-27 or rAAV-GFP (n=16), and then challenged 7 days later with

645  $5 \times 10^5$  CFU of USA300 LAC::lux on a contaminated transtibial pin as described in Materials and

646 Methods. Longitudinal BLI **(B)** and animal weight **(C)** were obtained on days 0, 1, 3, 7, 10 & 14, and

647 the data are presented as the mean +/- SD (\* $p$ <0.05 on Day 3, \*\*\* $p$ <0.001 on Day 10 and 14, two-way

648 ANOVA). **(D)** Photographs of the infected tibiae were obtained on day 14, and representative images of



649 the large vs. small draining abscesses observed in the rAAV-GFP and rAAV-IL-27 treated mice  
650 respectively are shown. The mice were euthanized on day 14, and the infected tibiae were harvested for  
651 CFU and micro-CT analyses. **(E)** CFUs from the implant, soft tissue and tibia were determined, and the  
652 data for each tibia are presented with the mean +/- SD for the group (n=10, \*\*\*\* $p < 0.0001$ , t test). **(F)**  
653 Representative 3D renderings of the extensive peri-implant osteolysis and reactive bone formation in  
654 rAAV-GFP vs. rAAV-IL-27 treated tibiae are shown with the volumetric bone loss in the infected tibiae.  
655 Data are presented for each tibia with the mean +/- SD for the group (n=6, \* $p < 0.05$ , t test).

656

657 **Figure 3. Absence of systemic IL-27 effects on implant associated osteomyelitis in IL-27R $\alpha^{-/-}$  mice.**

658 Female IL-27R $\alpha^{-/-}$  mice (C57BL/6 background) were intramuscularly injected with rAAV-IL-27 or  
659 rAAV- GFP and then challenged with a MRSA (USA300 LAC::lux) contaminated transtibial implant as  
660 described in Figure 2. Animal weight **(A)** and BLI **(B)** were obtained on days 0, 1, 3, 7, 10 & 14, and the  
661 data are presented as the mean +/- SD for the group (n=5). **(C)** Representative photographs obtained on  
662 day 14 post-surgery, illustrate similar large draining abscesses in both groups. **(D)** CFUs from the  
663 implant, surgical site soft tissue, and tibia were determined after euthanasia on day 14 post-op, and data  
664 from each tibia are presented with the mean +/- SD for the group (n=5). No differences were observed  
665 between the experimental groups.

666

667 **Figure 4. Identification of systemic IL-27 affected pathways during the establishment of implant-**  
668 **associated osteomyelitis via bulk RNA sequencing of *S. aureus*-infected tibia.** **(A)** MRSA-infected

669 tibiae were collected on days 1, 3, 7 and 14 post-septic surgery for bulk RNA sequencing (n=3), and  
670 differential gene expression between rAAV-IL-27 and rAAV-GFP treated mice were evaluated using  
671 DESeq2-1.22.1 R/Bioconductor package. **(B)** The number of significant differentially up-regulated and  
672 down-regulated genes in mice treated with rAAV-IL-27 on each day is shown. **(C)** Expression of *IL27*  
673 in infected tibiae was upregulated in mice treated with rAAV-IL-27, suggesting a positive feedback

674 effect. (\*\*\*\* $p < 0.0001$  on days 1 & 3, \*\*\* $p < 0.001$  on days 7 & 14). (D) Venn diagram analyses showing  
675 the overlap of DEGs across days 1, 3, 7 and 14 post-septic surgery in mice treated with rAAV-IL-27  
676 vs. rAAV-GFP, respectively. (E) Ingenuity Pathway Analysis (IPA) was utilized to identify canonical  
677 pathways of DEGs between rAAV-IL-27 vs. rAAV-GFP treated mice over time. Significant association  
678 ( $p < 0.05$ ) were calculated based on the Fisher's right tailed exact test. The orange and blue colored bars  
679 indicate predicted pathway activation or predicted pathway suppression in mice treated with rAAV-IL-  
680 27 vs. rAAV-GFP respectively (z-score). White bars indicate z-score at or very close to 0. Some pro-  
681 inflammatory/immune pathways including IL-17 signaling, Th17 activating pathway, IL-2 signaling  
682 were activated in mice treated with rAAV-IL-27 on day 1 following infection. On the other hand, these  
683 pathways and others (e.g.) were estimated to be suppressed at later time points. Moreover,  
684 immunosuppressive PD-1/PD-L1 signaling pathway was upregulated at later time points. These results  
685 indicate that IL-27 is a biphasic cytokine that activates pro-inflammatory/immune pathways early upon  
686 *S. aureus* infection, and then suppresses them late to prevent tissue damage and cytokine storm.

687

688 **Figure 5. IL-27 up-regulated pro-inflammatory cytokines during the initiation of implant-**  
689 **associated *S. aureus* osteomyelitis and their down-regulation during chronic infection.** DEGs in the  
690 (A) IL-23, (B) Th17, (C) TLR, and (D) iNOS signaling pathways are shown with log<sub>2</sub> fold change on  
691 each day as heatmaps. The orange and blue colored bars indicate up-regulation or down-regulation in  
692 mice treated with rAAV-IL-27 vs. rAAV-GFP, respectively (log<sub>2</sub> fold change,  $p < 0.05$ ). Pro-  
693 inflammatory cytokine coding genes such as *IL17A*, *IL17F*, *IL21*, and *IL12B* were upregulated on day-1  
694 post-surgery. In contrast, pro-inflammatory cytokine genes such as *IL17A*, *IL12A*, *TNF*, and *IL6* were  
695 downregulated on day-14.

696

697 **Figure 6. Systemic IL-27 inhibits osteoclast formation during implant-associated osteomyelitis.** (A)  
698 Data from the IPA in Figure 4 are shown to illustrate the decrease in RANK signaling in rAAV-IL27 vs.

699 rAAV-GFP treated infected tibiae on days 3, 7 and 14. **(B)** To confirm the gene expression data, tibiae  
700 from the mice described Figure 2 were processed for histology. Representative 2x images of tibia  
701 sections stained for TRAP (red/purple) are shown (scale bars = 500  $\mu$ m). **(C)** % TRAP-stained area was  
702 quantified within the cortical bone regions, trabecular bone regions, and implant sites (red box), and the  
703 data are presented for each tibia with the mean +/- SD for the group (n=6, \*\* $p$ <0.05, t test).

704

705 **Figure 7. Schematic model of IL-27 mediated immune homeostasis during *S. aureus* osteomyelitis.**

706 Here, we propose a model of IL-27-mediated immune homeostasis during *S. aureus* osteomyelitis in  
707 which IL-27 promotes host immune reaction against *S. aureus* osteomyelitis by regulating its reported  
708 diverse immune-activation and immune-suppression effects in a time dependent manner. **(A)** At the  
709 onset of *S. aureus* osteomyelitis, IL-27 promotes production of pro-inflammatory cytokines, leading to  
710 enhanced bacteria killing by macrophages and neutrophils. **(B)** In contrast, at later stages of *S. aureus*  
711 osteomyelitis following acute reaction, IL-27 decreases production of pro-inflammatory cytokines and  
712 osteoclastogenesis, which prevents cytokine storm and osteolysis.

713

714 **Supplemental Figure 1. Systemic IL-27 does not affect biofilm formation on the implant during *S.***

715 ***aureus* implant-associated osteomyelitis in vivo.** Mice were intramuscularly injected with rAAV-IL-  
716 27 or rAAV-GFP and then challenged with a MRSA (USA300 LAC::lux) contaminated transtibial  
717 implant as described in Figure 2. Biofilm formation on the implant was determined via SEM processing  
718 and imaging after euthanasia on day 14 post-op. No difference was detected in %biofilm formation area  
719 on implant between rAAV-IL-27 and rAAV-GFP challenged mice (n=6).

720

721 **Supplemental Figure 2. IL-27 does not stimulate myeloid cell chemotaxis.** HL-60 cells were

722 differentiated 7 days in the presence or absence of dimethylformamide (DMF) (9  $\mu$ g/ml), and then

723 placed in Boyden chambers. Cell culture media with or without IL-27 or fMLP (positive-control) was

724 placed in the well below the chamber and incubated for 1 hour. Subsequently, cells which migrated in  
725 each well were stained with fluorescent dye and signal intensity was evaluated using a fluorescent plate  
726 reader (n=2). No difference in chemotactic activity of granulocytes was observed between the  
727 experimental groups.

728

729 **Supplemental Figure 3. IL-27 enhances LPS-induced NO<sup>-</sup> production by macrophage cultures.**

730 Primary bone marrow derived murine macrophages were pretreated with PBS or IL-27 (50 ng/ml) for 24  
731 hours, and then stimulated with LPS (100 ng/ml) in the presence or absence of IL-27 (50 ng/ml) for 24  
732 hours. Nitrite levels in the culture supernatant was determined via Griess reaction assay, and the data  
733 from each experiment are presented with the mean +/- SD for the group (n=3, \* $p < 0.05$ , \*\* $p < 0.01$ ,  
734 \*\*\*\* $p < 0.0001$  by one-way ANOVA).

Figure 1

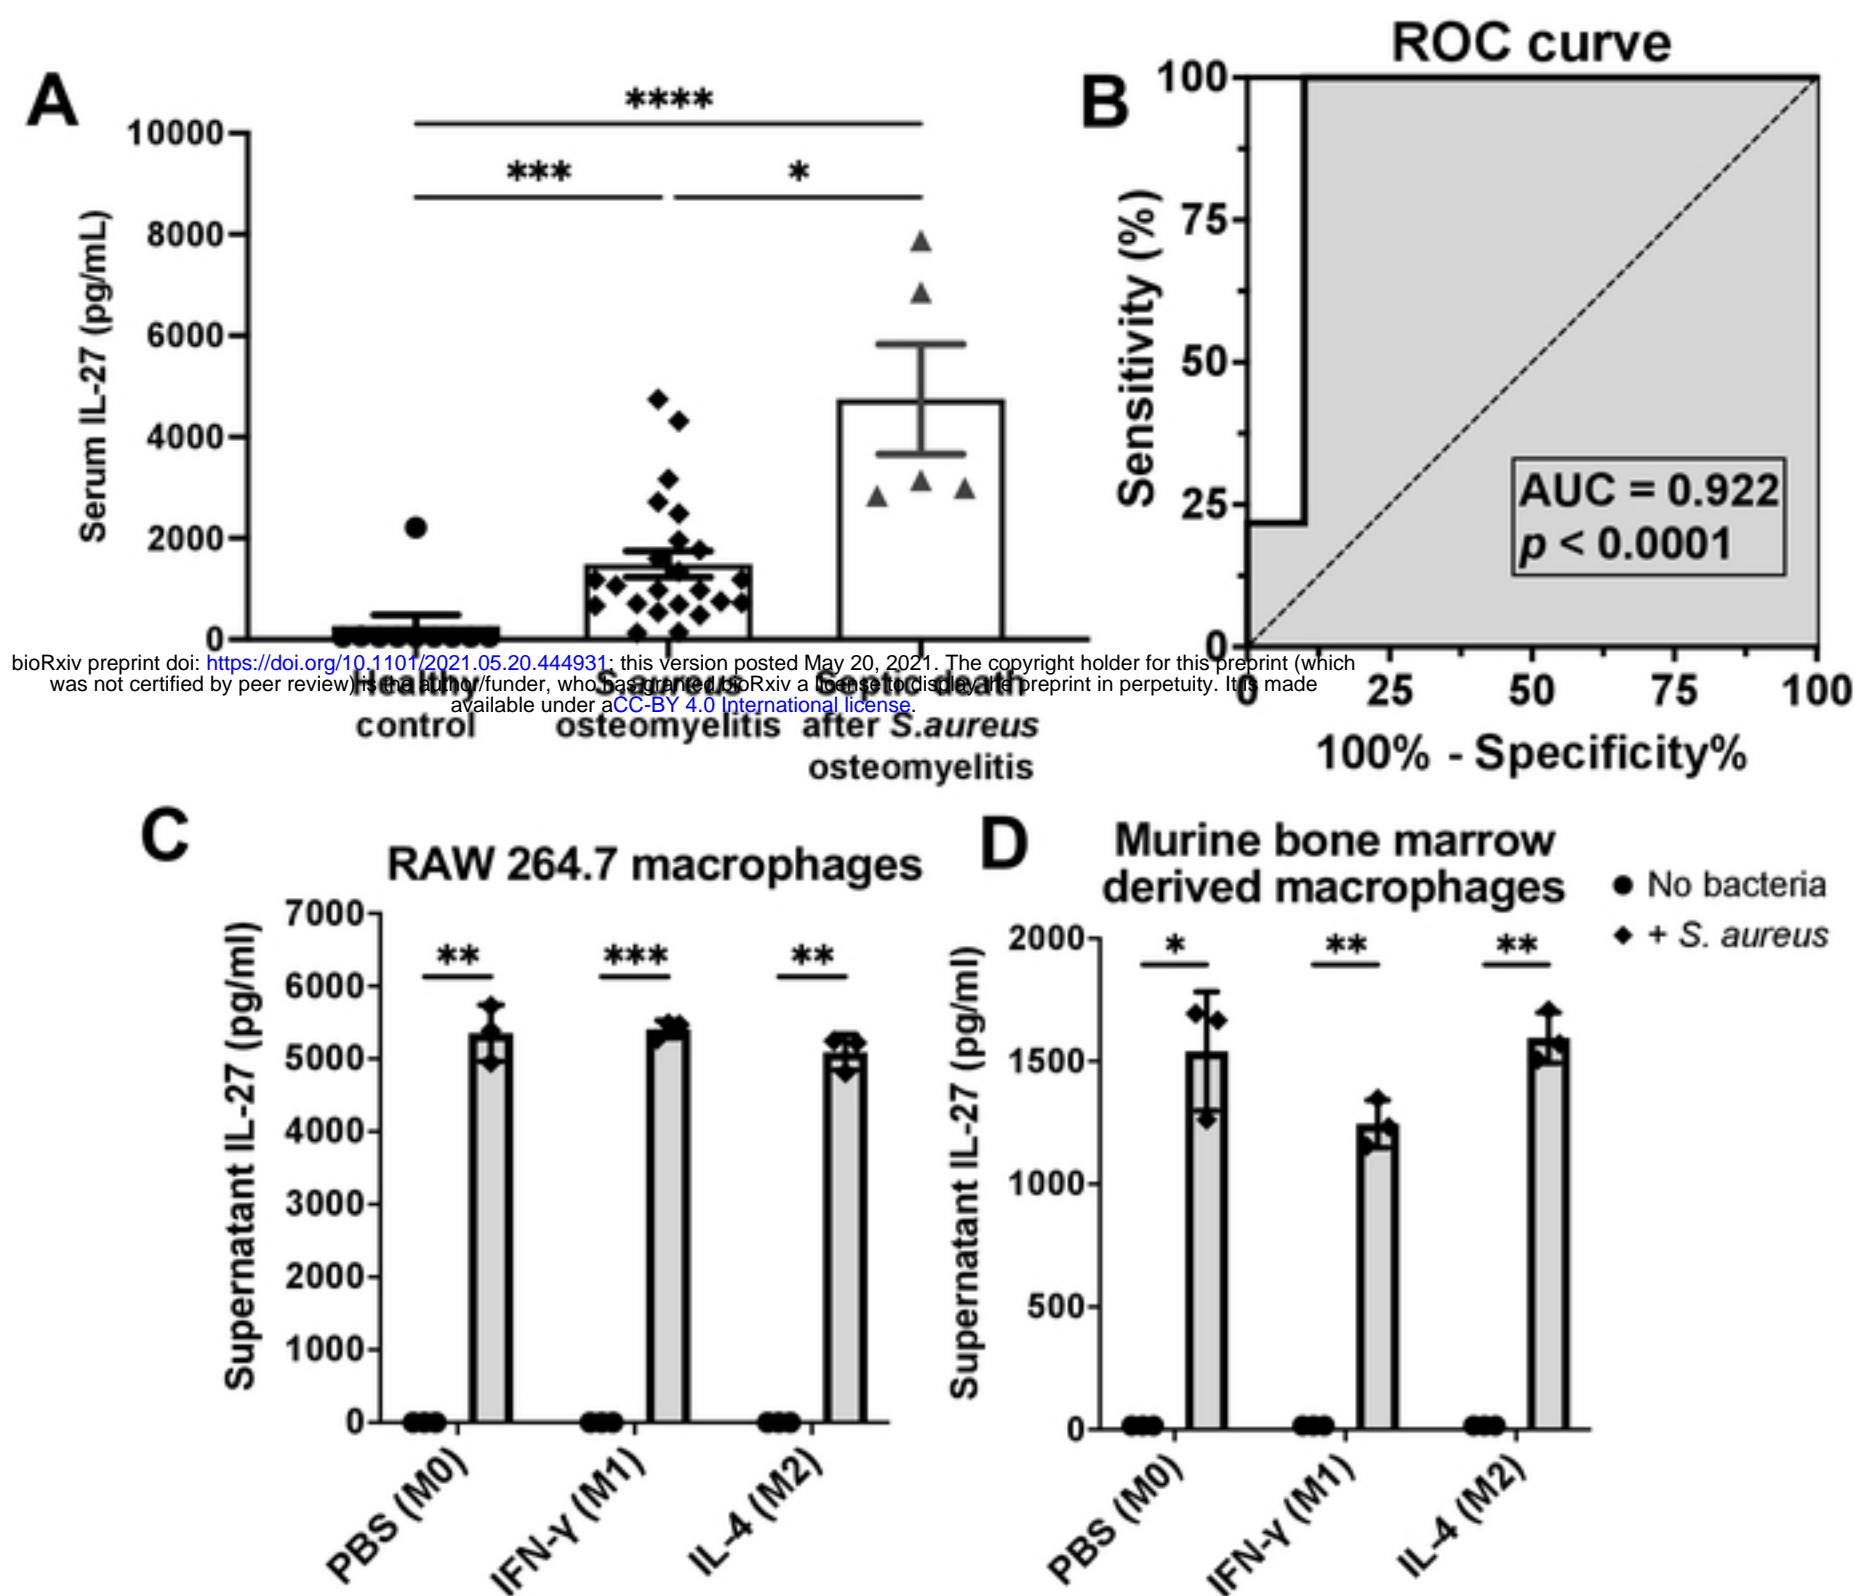

**Figure 1. IL-27 levels are elevated in patients and in mice with *S. aureus* infection.** **A)** Serum samples were collected from healthy people (n=10), orthopaedic patients with culture confirmed *S. aureus* bone infections (n=23), and patients who died from septic *S. aureus* osteomyelitis (n=5). Serum IL-27 levels were determined via Luminex assay, and the data for each sample is presented with the mean +/- SEM for the group. **B)** The Luminex data were utilized to perform a receiver operating characteristic (ROC) curve, and the area under the curve (AUC) between controls and infected patients is presented. Note that serum IL-27 levels are highly diagnostic of *S. aureus* osteomyelitis. The dashed line represents a non-discriminatory test with equal sensitivity and specificity. In vitro cultures of **(C)** RAW264.7 cells and **(D)** primary murine bone marrow-derived macrophages were differentiated with PBS, IFN- $\gamma$  (50ng/ml) or IL-4 (20ng/ml) to generate M0, M1 and M2 cells respectively, and then exposed to *S. aureus* USA300 (MOI = 10). These cultures were incubated for 24 hours, and IL-27 levels in the supernatants were assessed via ELISA. The data from each experiment are presented with the mean +/- SD for the group (n=3) (\*p<0.05, \*\*p<0.01, \*\*\*p<0.001 \*\*\*\*p<0.0001, ANOVA).

Figure 2

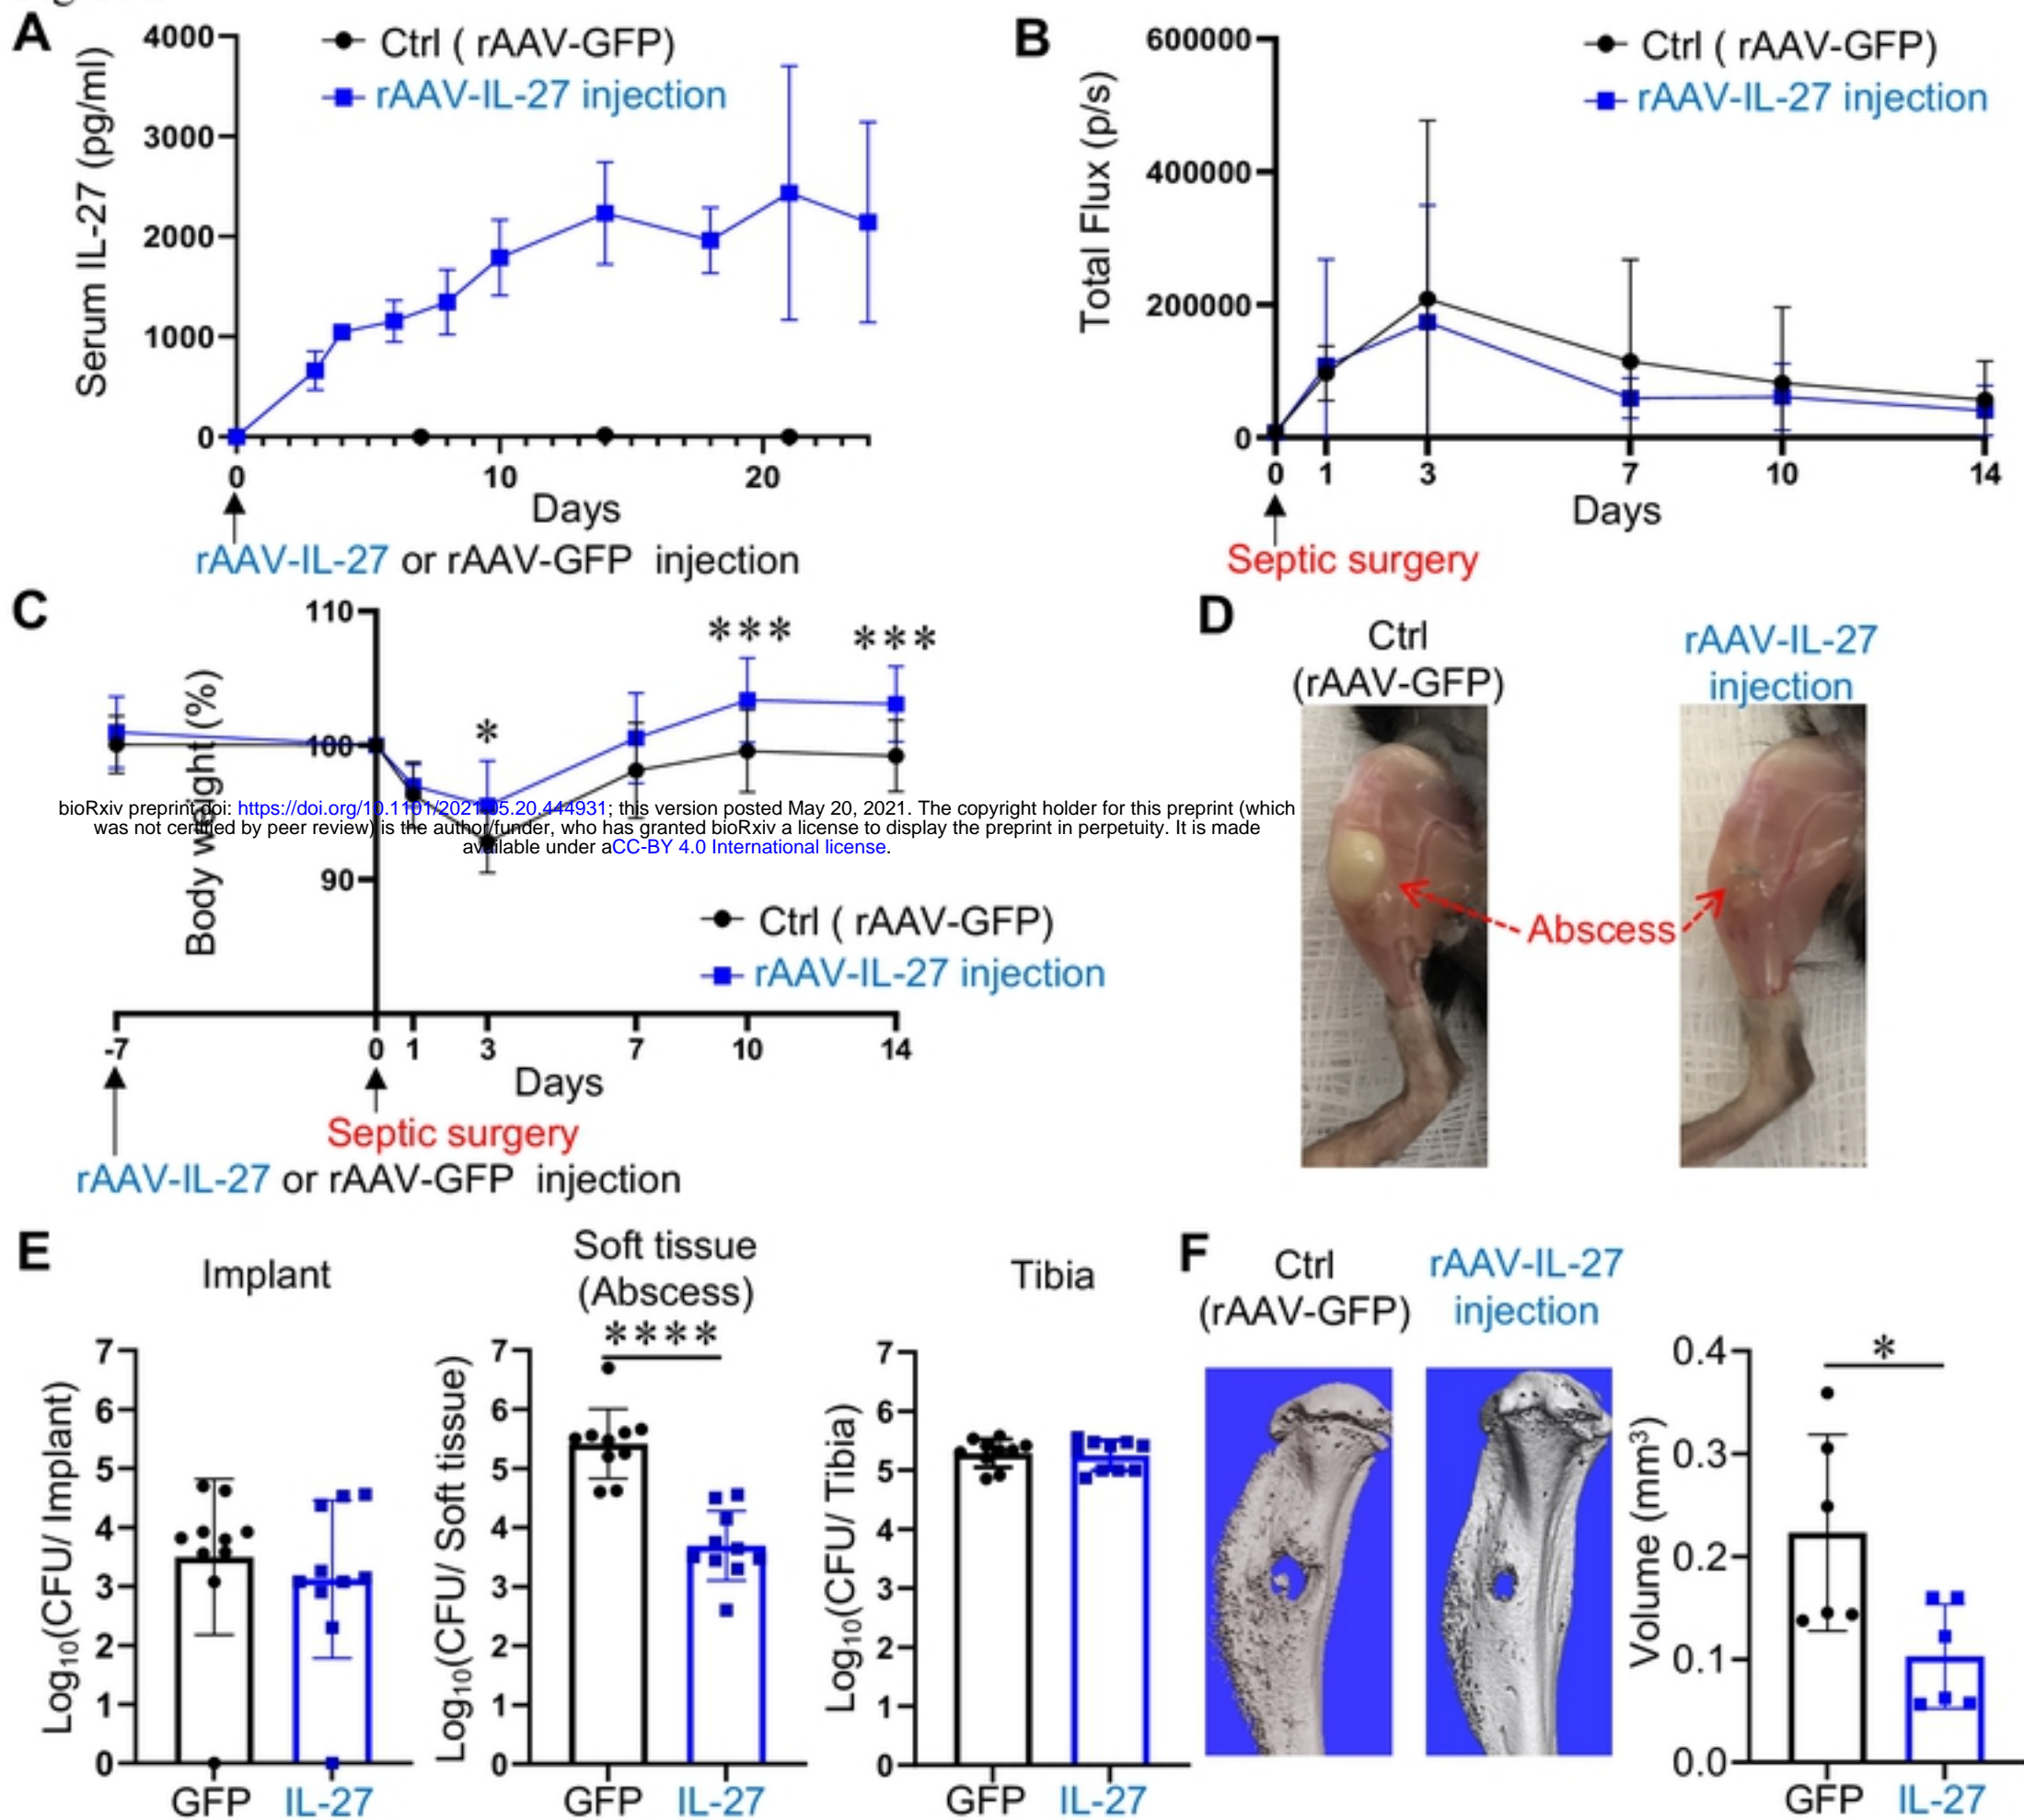

**Figure 2. Systemic IL-27 ameliorates surgical site soft tissue infection and osteolysis during *S. aureus* implant-associated osteomyelitis.** (A) 8-week-old female C57BL/6 mice received  $0.5 \times 10^{12}$  genome copies/mouse of rAAV-IL-27 (n=3) or rAAV-GFP (control, n=5) via intramuscular injection, and serum samples were collected longitudinally to assess IL-27 levels via ELISA. Exogenous IL-27 levels in sera are presented as the mean  $\pm$  SD. (B-F) A separate cohort of these mice were intramuscularly injected with rAAV-IL-27 or rAAV-GFP (n=16), and then challenged 7 days later with  $5 \times 10^5$  CFU of USA300 LAC::lux on a contaminated transtibial pin as described in Materials and Methods. Longitudinal BLI (B) and animal weight (C) were obtained on days 0, 1, 3, 7, 10 & 14, and the data are presented as the mean  $\pm$  SD (\* $p < 0.05$  on Day 3, \*\*\* $p < 0.001$  on Day 10 and 14, two-way ANOVA). (D) Photographs of the infected tibiae were obtained on day 14, and representative images of the large vs. small draining abscesses observed in the rAAV-GFP and rAAV-IL-27 treated mice respectively are shown. The mice were euthanized on day 14, and the infected tibiae were harvested for CFU and micro-CT analyses. (E) CFUs from the implant, soft tissue and tibia were determined, and the data for each tibia are presented with the mean  $\pm$  SD for the group (n=10, \*\*\*\* $p < 0.0001$ , t test). (F) Representative 3D renderings of the extensive peri-implant osteolysis and reactive bone formation in rAAV-GFP vs. rAAV-IL-27 treated tibiae are shown with the volumetric bone loss in the infected tibiae. Data are presented for each tibia with the mean  $\pm$  SD for the group (n=6, \* $p < 0.05$ , t test).

Figure 3

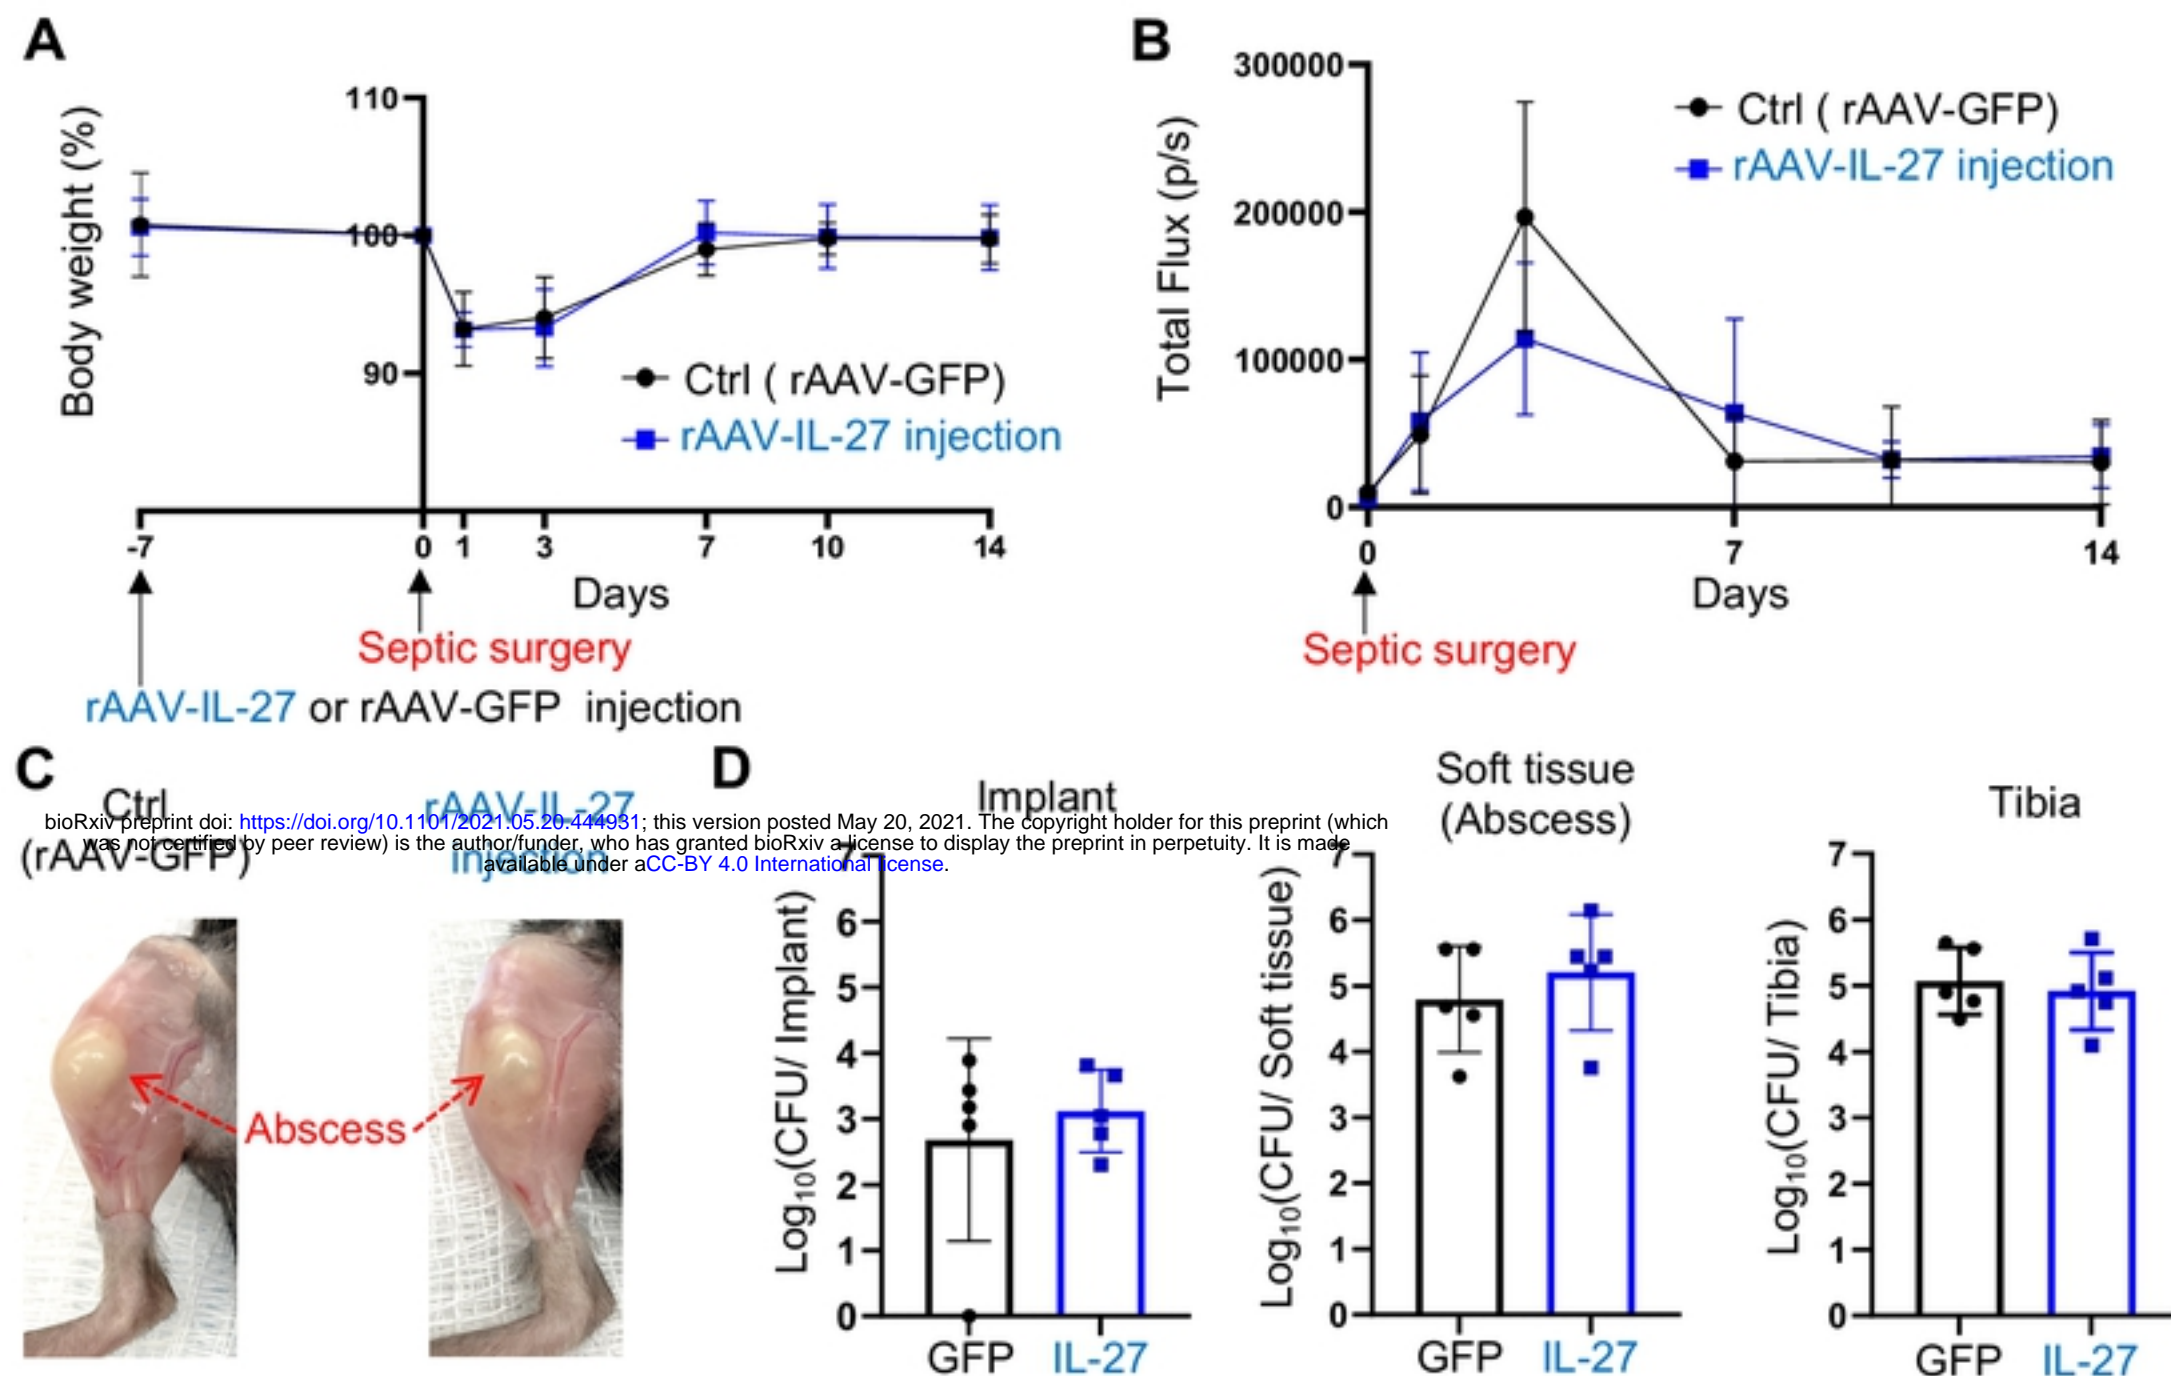

**Figure 3. Absence of systemic IL-27 effects on implant associated osteomyelitis in IL-27R $\alpha$ <sup>-/-</sup> mice.** Female IL-27R $\alpha$ <sup>-/-</sup> mice (C57BL/6 background) were intramuscularly injected with rAAV-IL-27 or rAAV-GFP and then challenged with a MRSA (USA300 LAC::lux) contaminated transtibial implant as described in Figure 2. Animal weight (A) and BLI (B) were obtained on days 0, 1, 3, 7, 10 & 14, and the data are presented as the mean +/- SD for the group (n=5). (C) Representative photographs obtained on day 14 post-surgery, illustrate similar large draining abscesses in both groups. (D) CFUs from the implant, surgical site soft tissue, and tibia were determined after euthanasia on day 14 post-op, and data from each tibia are presented with the mean +/- SD for the group (n=5). No differences were observed between the experimental groups.

Figure 4

**A**

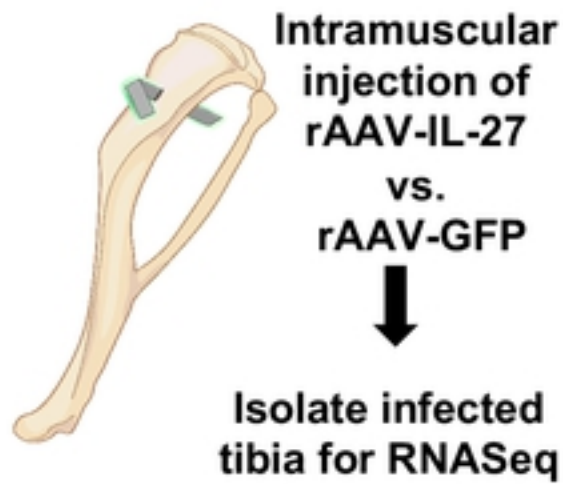

**B**

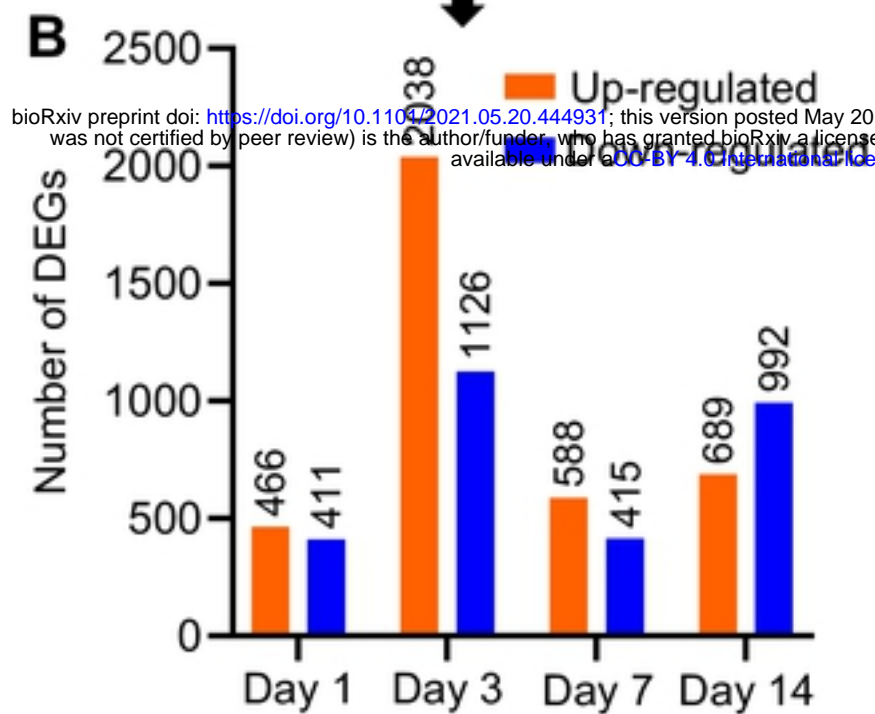

**C**

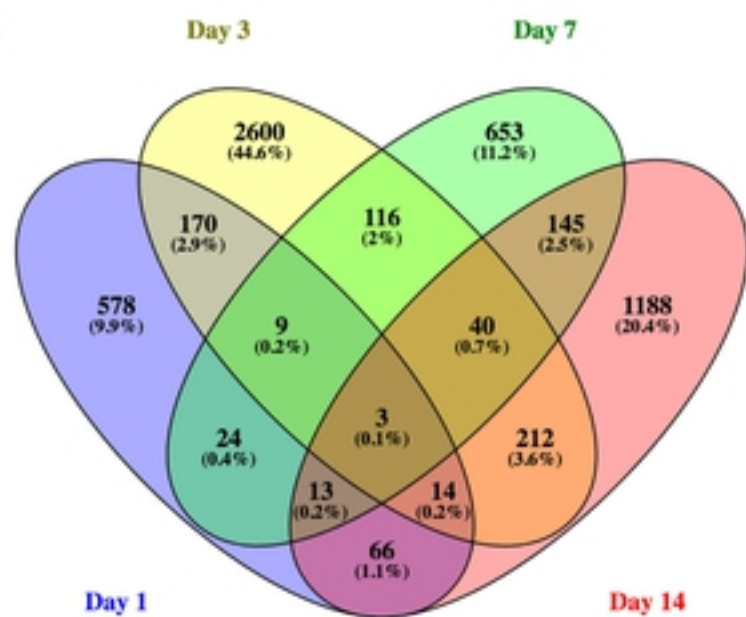

**D**

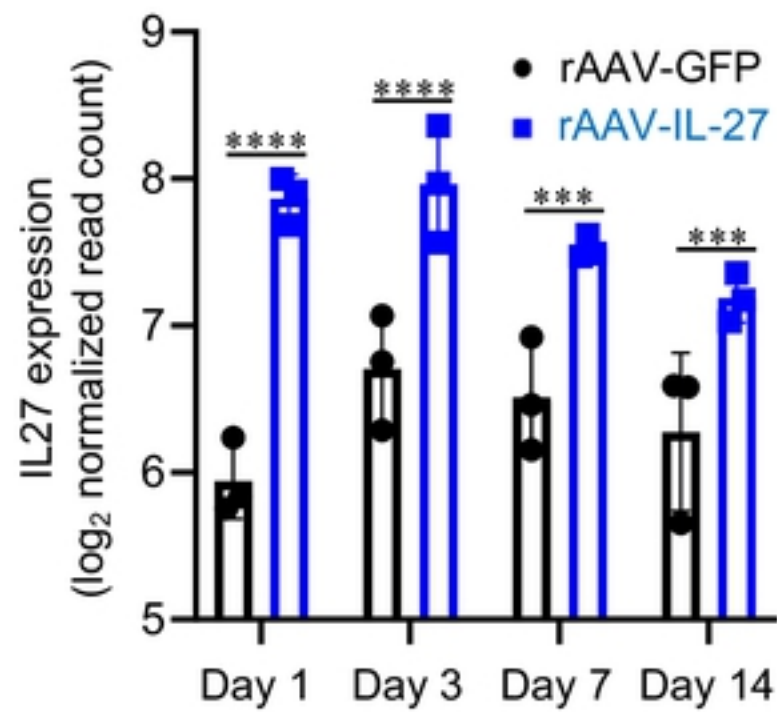

**E**

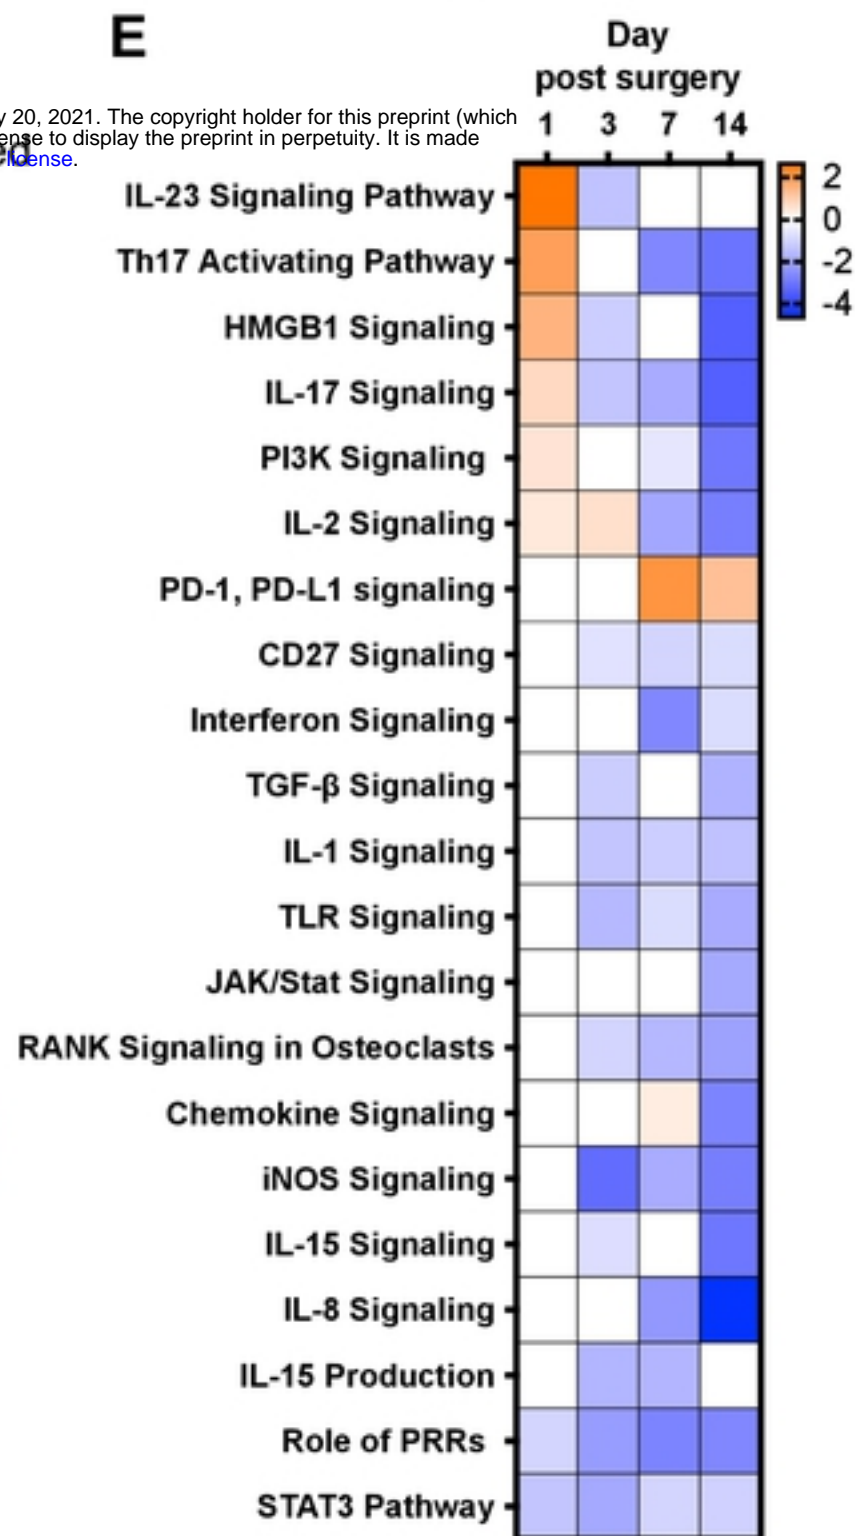

bioRxiv preprint doi: <https://doi.org/10.1101/2021.05.20.444931>; this version posted May 20, 2021. The copyright holder for this preprint (which was not certified by peer review) is the author/funder, who has granted bioRxiv a license to display the preprint in perpetuity. It is made available under aCC-BY 4.0 International license.



**Figure 4. Identification of systemic IL-27 affected pathways during the establishment of implant-associated osteomyelitis via bulk RNA sequencing of *S. aureus*-infected tibia.** (A) MRSA-infected tibiae were collected on days 1, 3, 7 and 14 post-septic surgery for bulk RNA sequencing (n=3), and differential gene expression between rAAV-IL-27 and rAAV-GFP treated mice were evaluated using DESeq2-1.22.1 R/Bioconductor package. (B) The number of significant differentially up-regulated and down-regulated genes in mice treated with rAAV-IL-27 on each day is shown. (C) Venn diagram analyses showing the overlap of DEGs across days 1, 3, 7 and 14 post-septic surgery in mice treated with rAAV-IL-27 vs. rAAV-GFP, respectively. (D) Expression of *IL27* in infected tibiae was upregulated in mice treated with rAAV-IL-27, suggesting a positive feedback effect. (\*\*\*\* $p < 0.0001$  on days 1 & 3, \*\*\* $p < 0.001$  on days 7 & 14). (E) Ingenuity Pathway Analysis (IPA) was utilized to identify canonical pathways of DEGs between rAAV-IL-27 vs. rAAV-GFP treated mice over time. Significant association ( $*p < 0.05$ ) were calculated based on the Fisher's right tailed exact test. The orange and blue colored bars indicate predicted pathway activation or suppression in mice treated with rAAV-IL-27 vs. rAAV-GFP respectively (z-score). White bars indicate z-score at or very close to 0. Some pro-inflammatory/immune pathways including IL-17 signaling, Th17 activating pathway, IL-2 signaling were activated in mice treated with rAAV-IL-27 on day 1 following infection. On the other hand, these pathways and others (e.g.) were suppressed at later time points. Moreover, immunosuppressive PD-1/PD-L1 signaling pathway was upregulated at later time points. These result indicate that IL-27 is a biphasic cytokine that activates pro-inflammatory/immune pathways early upon *S. aureus* infection, and then suppresses them late to prevent tissue damage and cytokine storm.

bioRxiv preprint doi: <https://doi.org/10.1101/2021.05.20.444931>; this version posted May 20, 2021. The copyright holder for this preprint (which was not certified by peer review) is the author/funder, who has granted bioRxiv a license to display the preprint in perpetuity. It is made available under aCC-BY 4.0 International license.

Figure 5

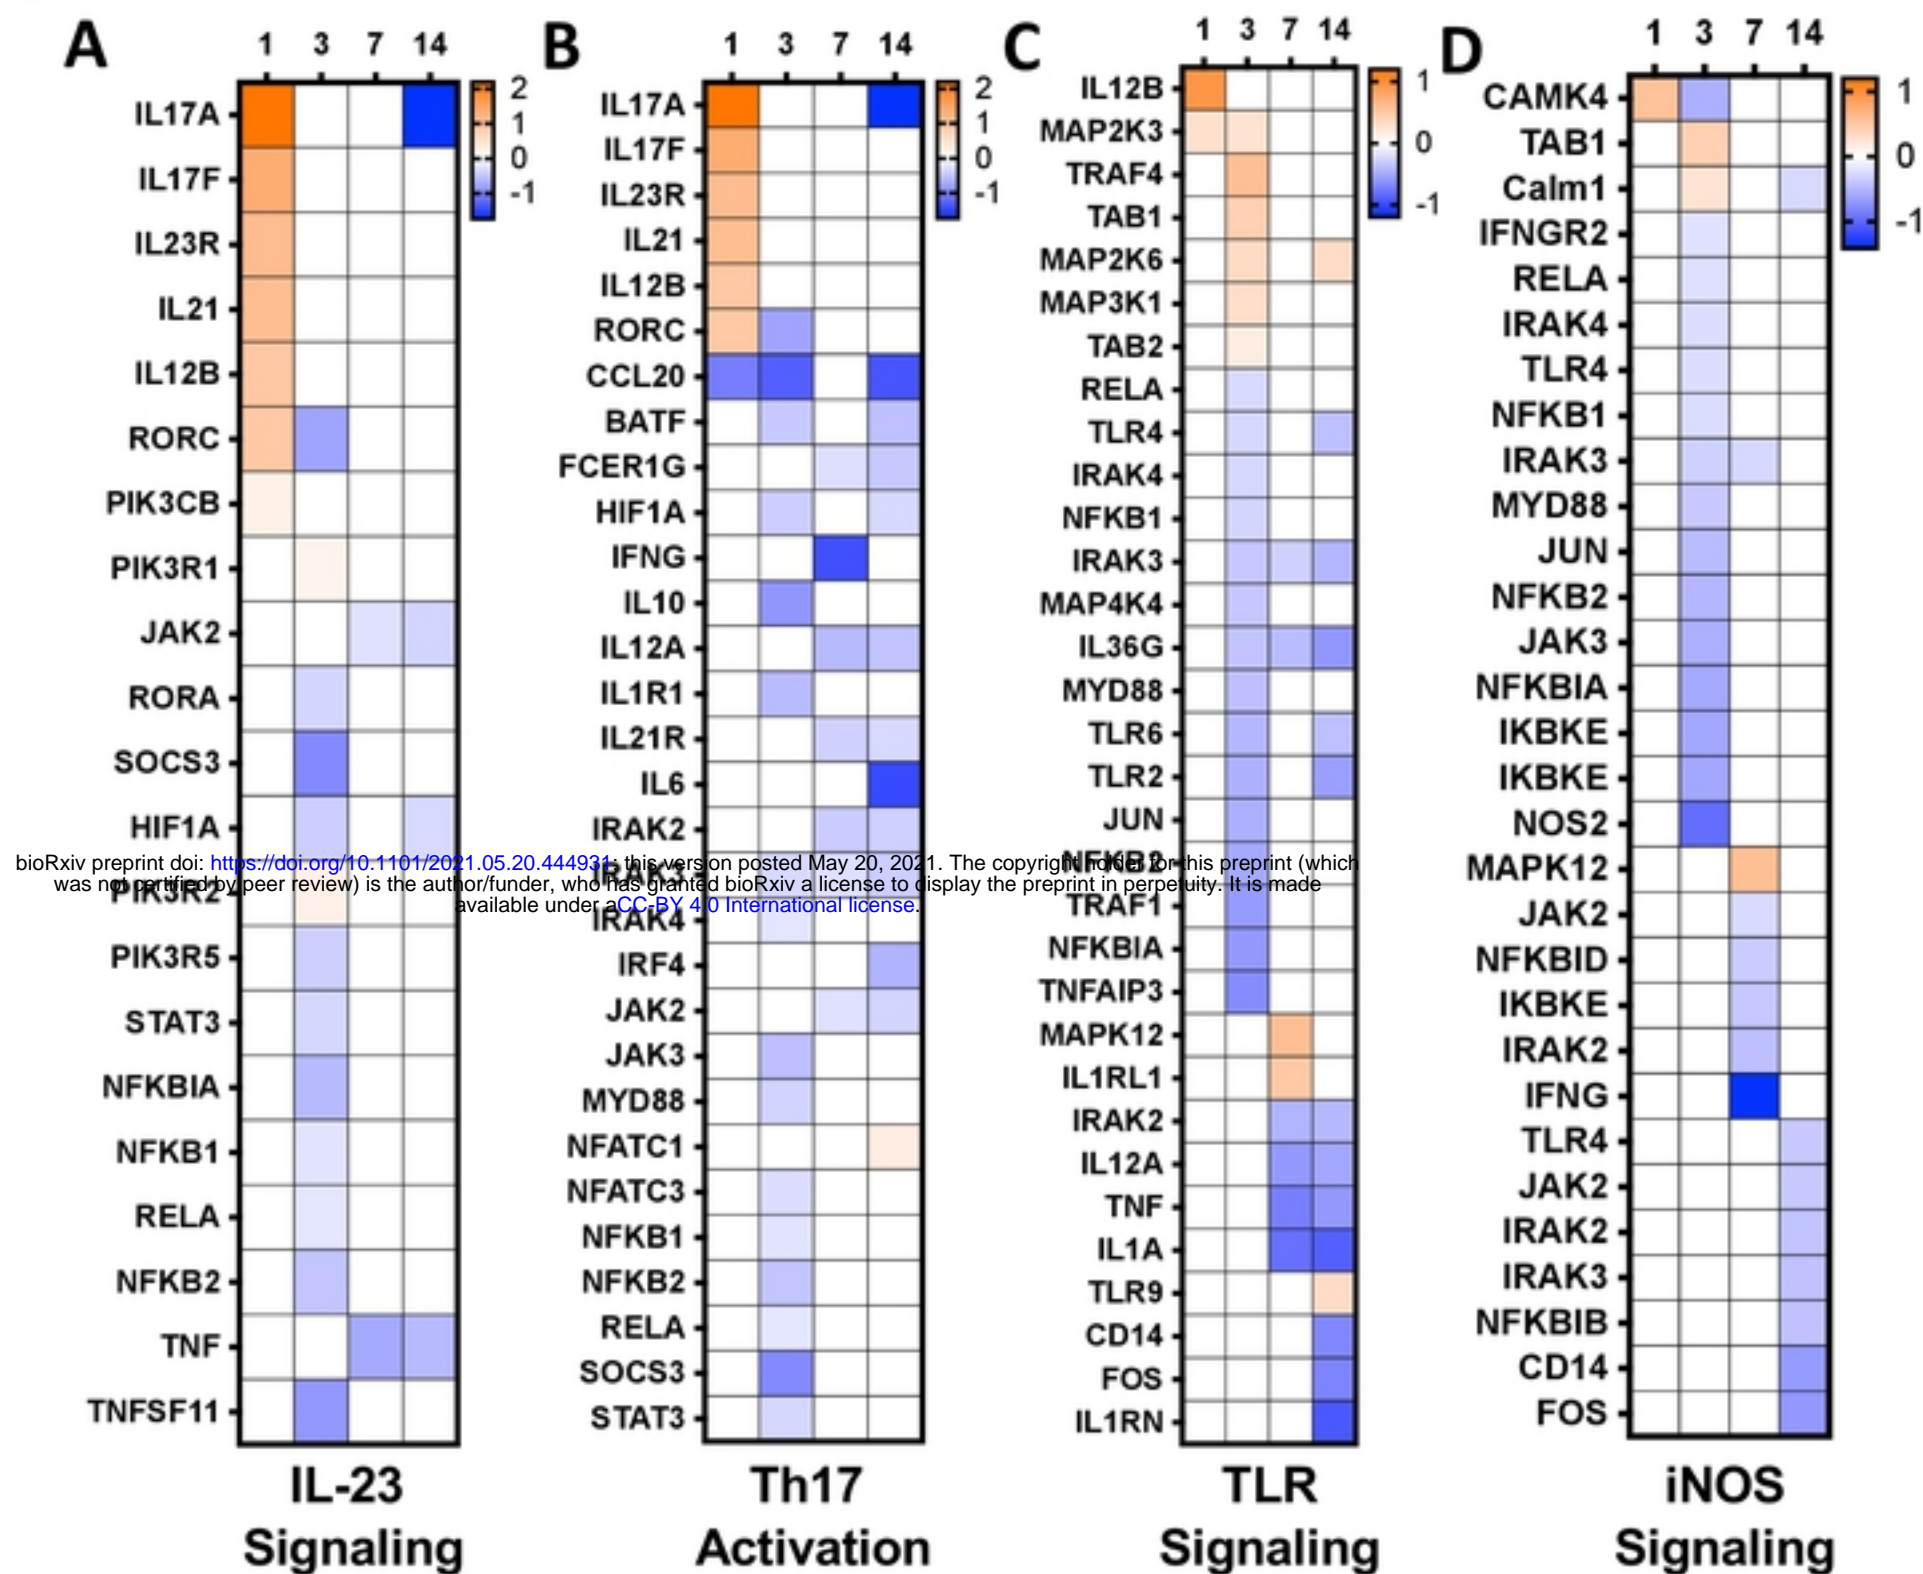

**Figure 5. IL-27 up-regulated pro-inflammatory cytokines during the initiation of implant-associated *S. aureus* osteomyelitis and their down-regulation during chronic infection.** DEGs in the (A) IL-23, (B) Th17, (C) TLR, and (D) iNOS signaling pathways are shown with  $\log_2$  fold change on each day as heatmaps. The orange and blue colored bars indicate up-regulation or down-regulation in mice treated with rAAV-IL-27 vs. rAAV-GFP, respectively ( $\log_2$  fold change,  $p < 0.05$ ). Pro-inflammatory cytokine coding genes such as *IL17A*, *IL17F*, *IL21*, and *IL12B* were upregulated on day-1 post-surgery. In contrast, pro-inflammatory cytokine genes such as *IL17A*, *IL12A*, *TNF*, and *IL6* were downregulated on day-14.

Figure 6

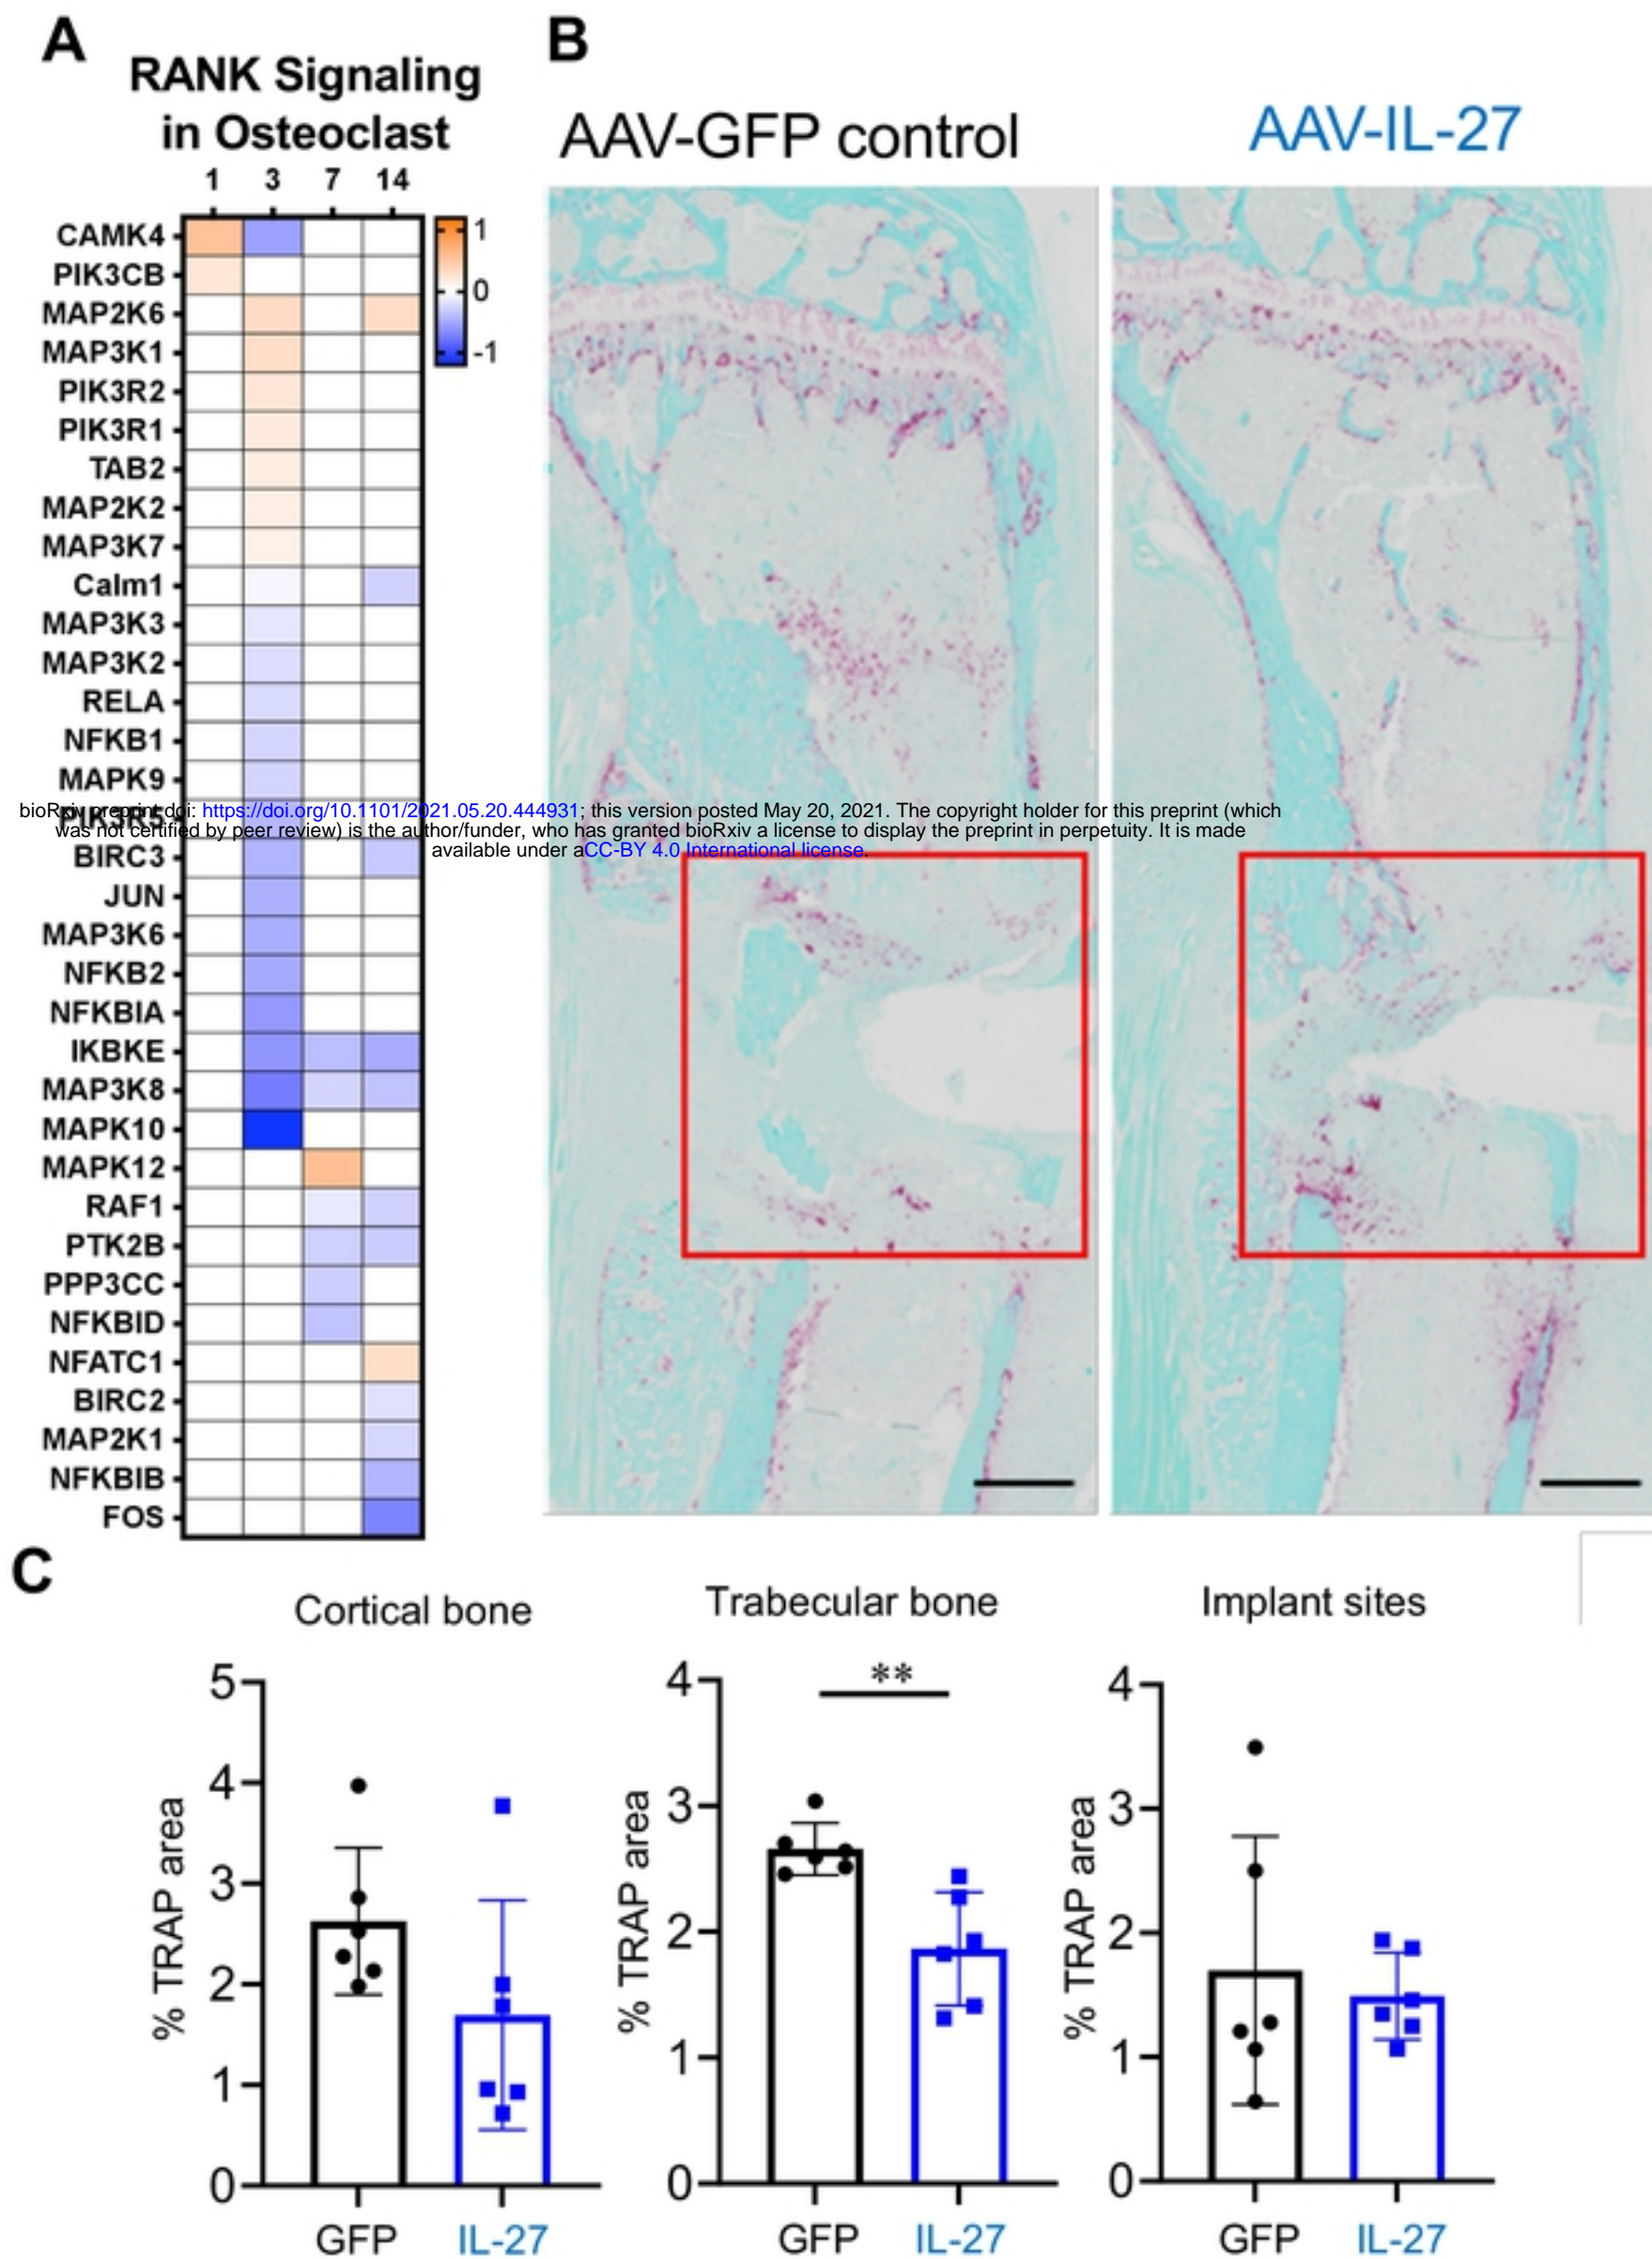

bioRxiv preprint doi: <https://doi.org/10.1101/2021.05.20.444931>; this version posted May 20, 2021. The copyright holder for this preprint (which was not certified by peer review) is the author/funder, who has granted bioRxiv a license to display the preprint in perpetuity. It is made available under aCC-BY 4.0 International license.

**Figure 6. Systemic IL-27 inhibits osteoclast formation during implant-associated osteomyelitis. (A)** Data from the IPA in Figure 4 are shown to illustrate the decrease in RANK signaling in rAAV-IL27 vs. rAAV-GFP treated infected tibiae on days 3, 7 and 14. **(B)** To confirm the gene expression data, tibiae from the mice described Figure 2 were processed for histology. Representative 2x images of tibia sections stained for TRAP (red/purple) are shown (scale bars = 500  $\mu$ m). **(C)** % TRAP-stained area was quantified within the cortical bone regions, trabecular bone regions, and implant sites (red box), and the data are presented for each tibia with the mean +/- SD for the group (n=6, \*\* $p$ <0.05, t test).

Figure 7

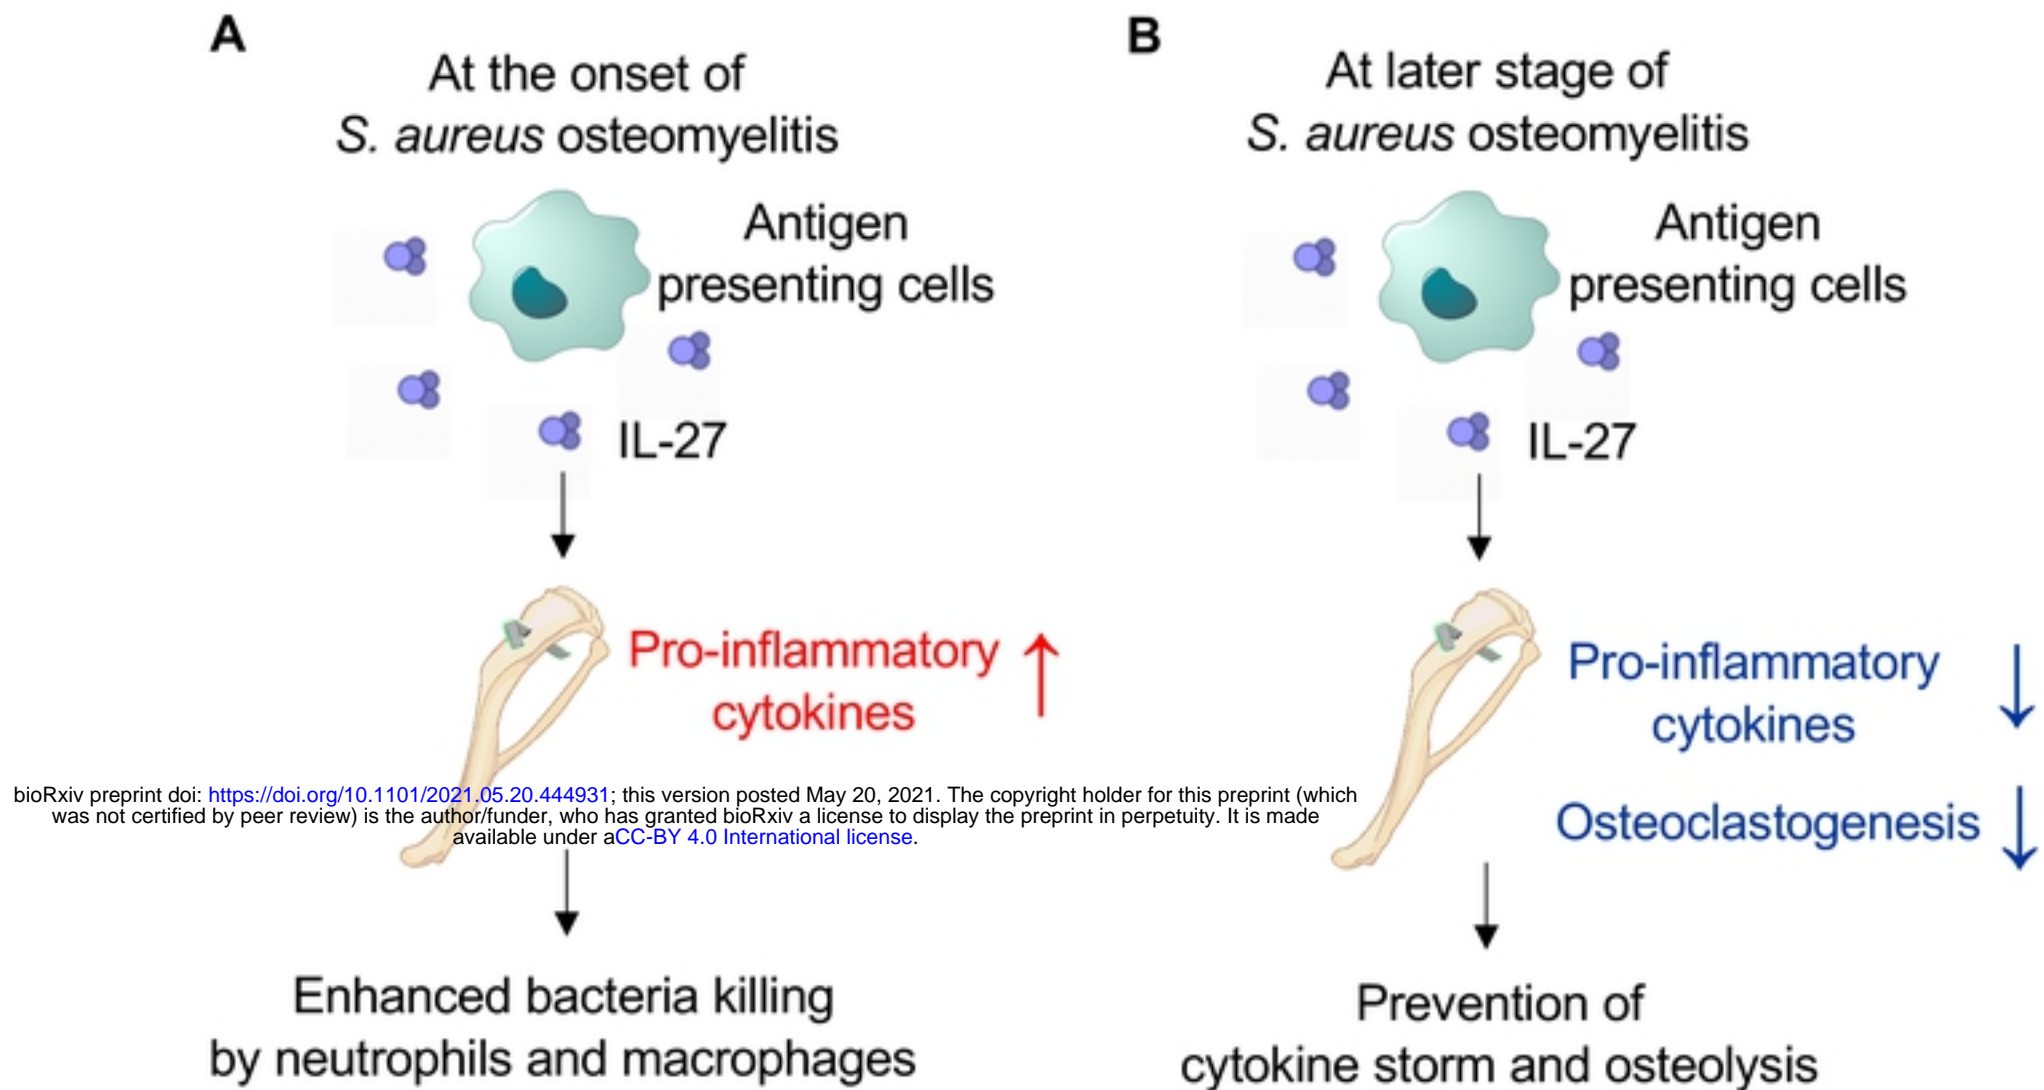

**Figure 7. Schematic model of IL-27 mediated immune regulation during *S. aureus* osteomyelitis.** A schematic model of IL-27-mediated immune regulation during *S. aureus* osteomyelitis is shown in which IL-27 promotes host immune reaction against *S. aureus* osteomyelitis by regulating its reported diverse immune-activation and immune-suppression effects in a time dependent manner. **(A)** At the onset of *S. aureus* osteomyelitis, IL-27 promotes production of pro-inflammatory cytokines, leading to enhanced bacteria killing by macrophages and neutrophils. **(B)** In contrast, at later stages of *S. aureus* osteomyelitis following acute reaction, IL-27 decreases production of pro-inflammatory cytokines and osteoclastogenesis, which prevents cytokine storm and osteolysis.

Supplemental Figure 1

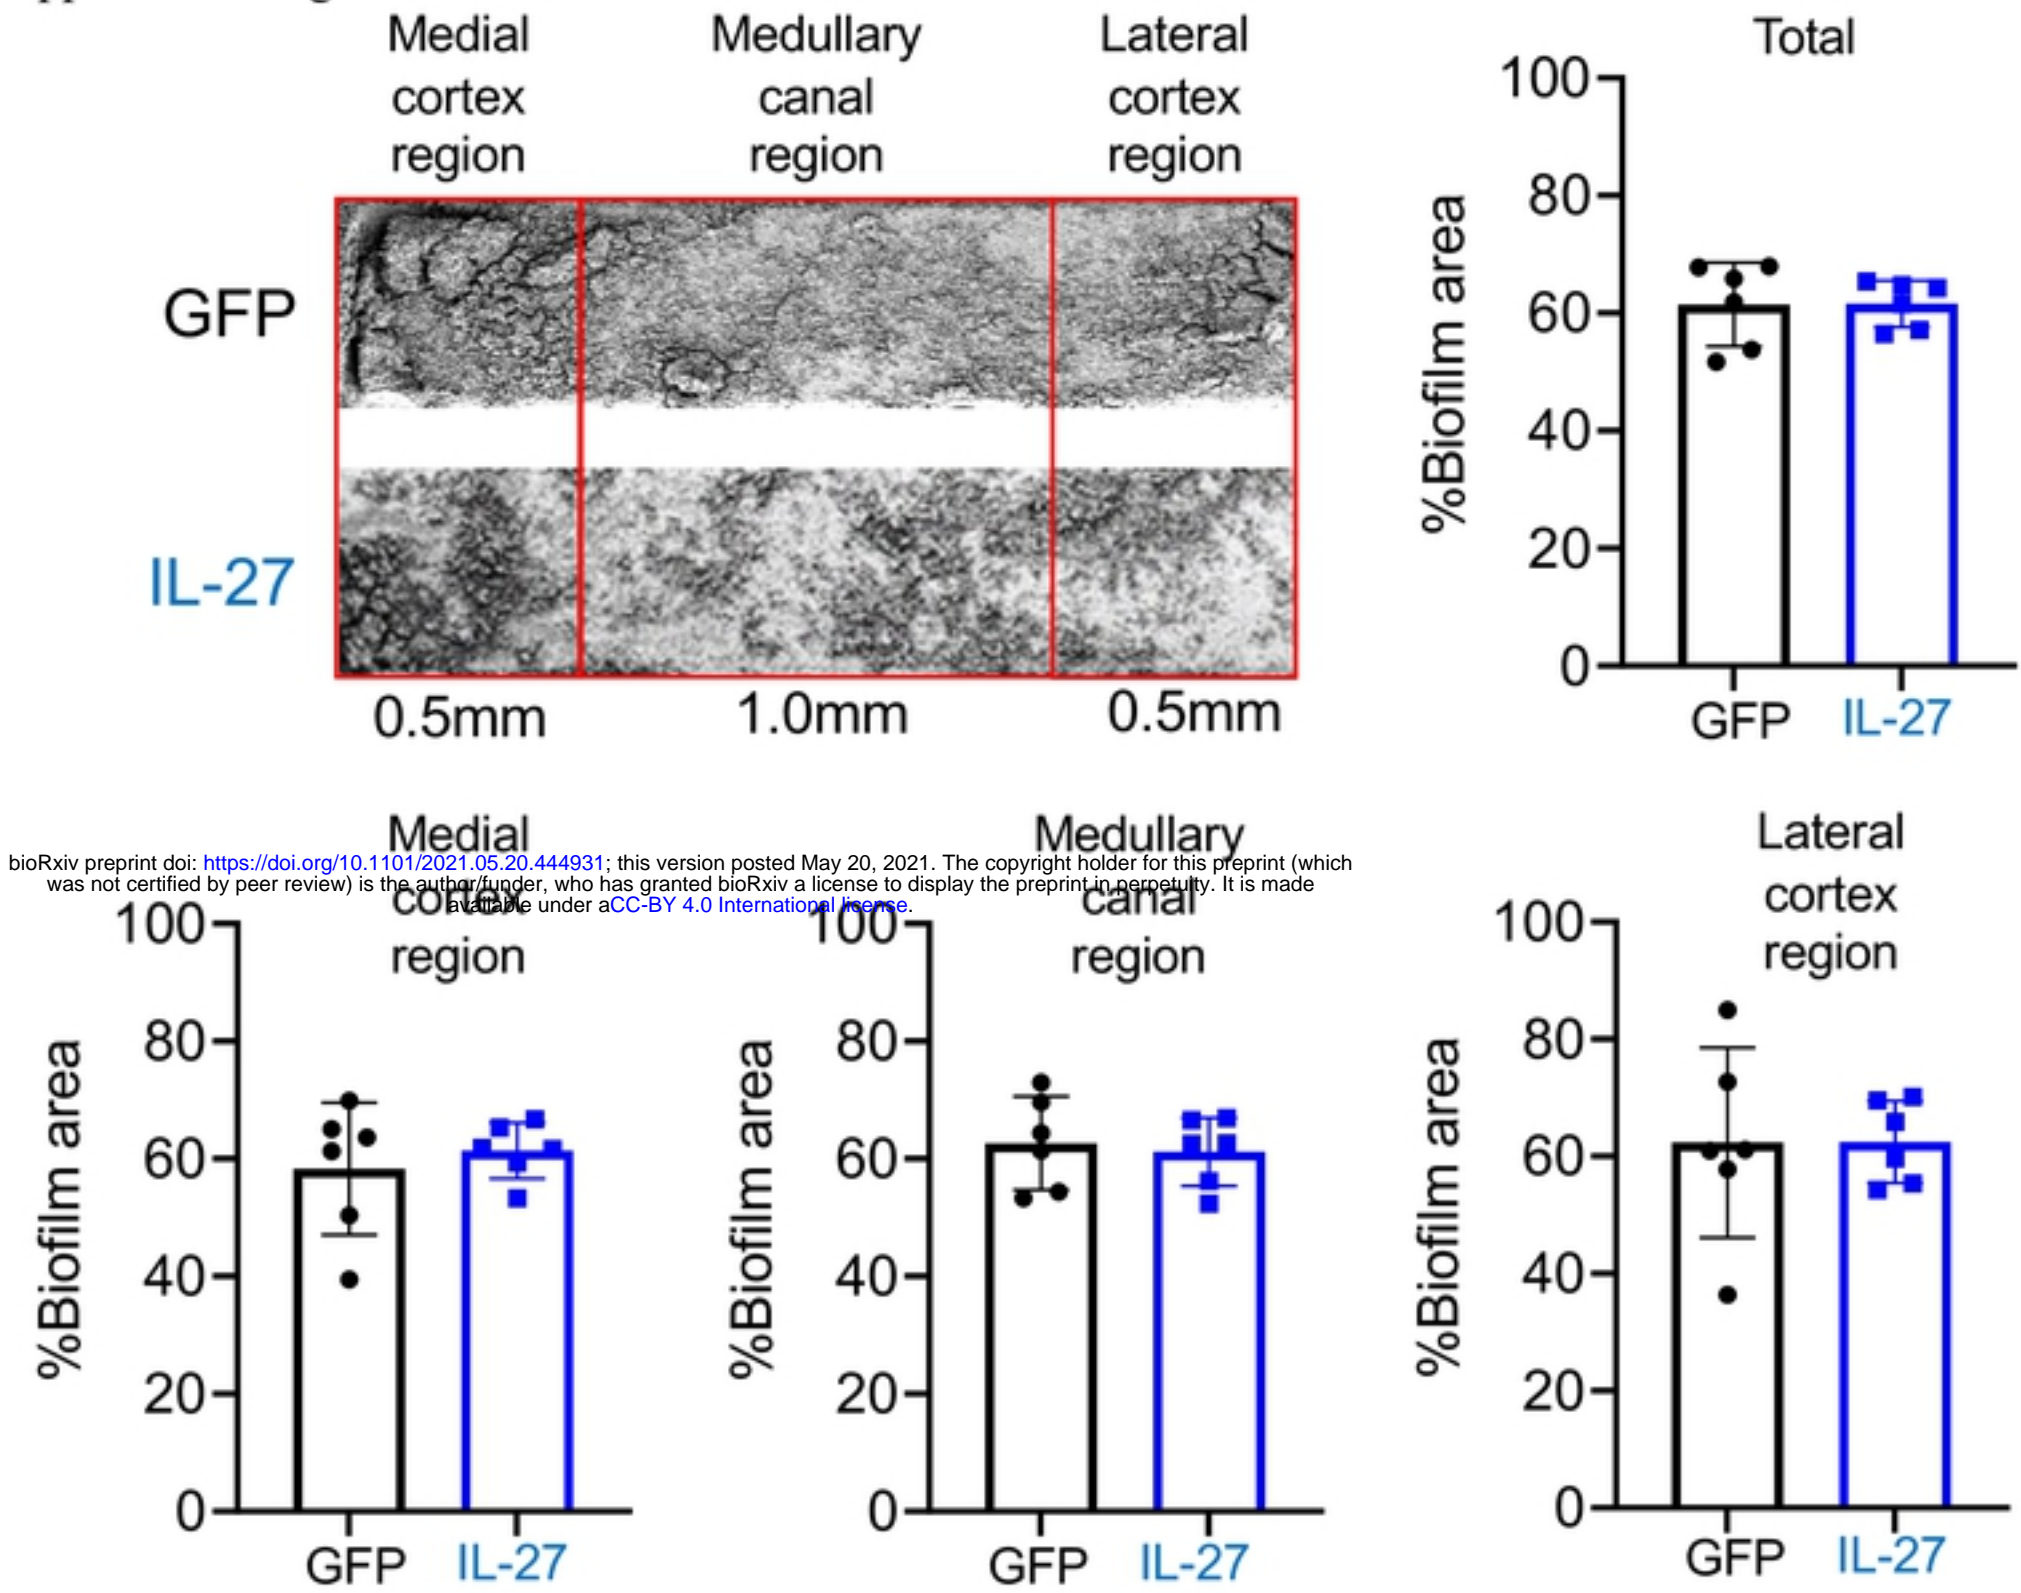

**Supplemental Figure 1. Systemic IL-27 does not affect biofilm formation on the implant during *S. aureus* implant-associated osteomyelitis in vivo.** Mice were intramuscularly injected with rAAV-IL-27 or rAAV-GFP and then challenged with a MRSA (USA300 LAC::lux) contaminated trans-tibial implant as described in Figure 2. Biofilm formation on the implant was determined via SEM processing and imaging after euthanasia on day 14 post-op. No difference was detected in %biofilm formation area on implant between rAAV-IL-27 and rAAV-GFP challenged mice (n=6).

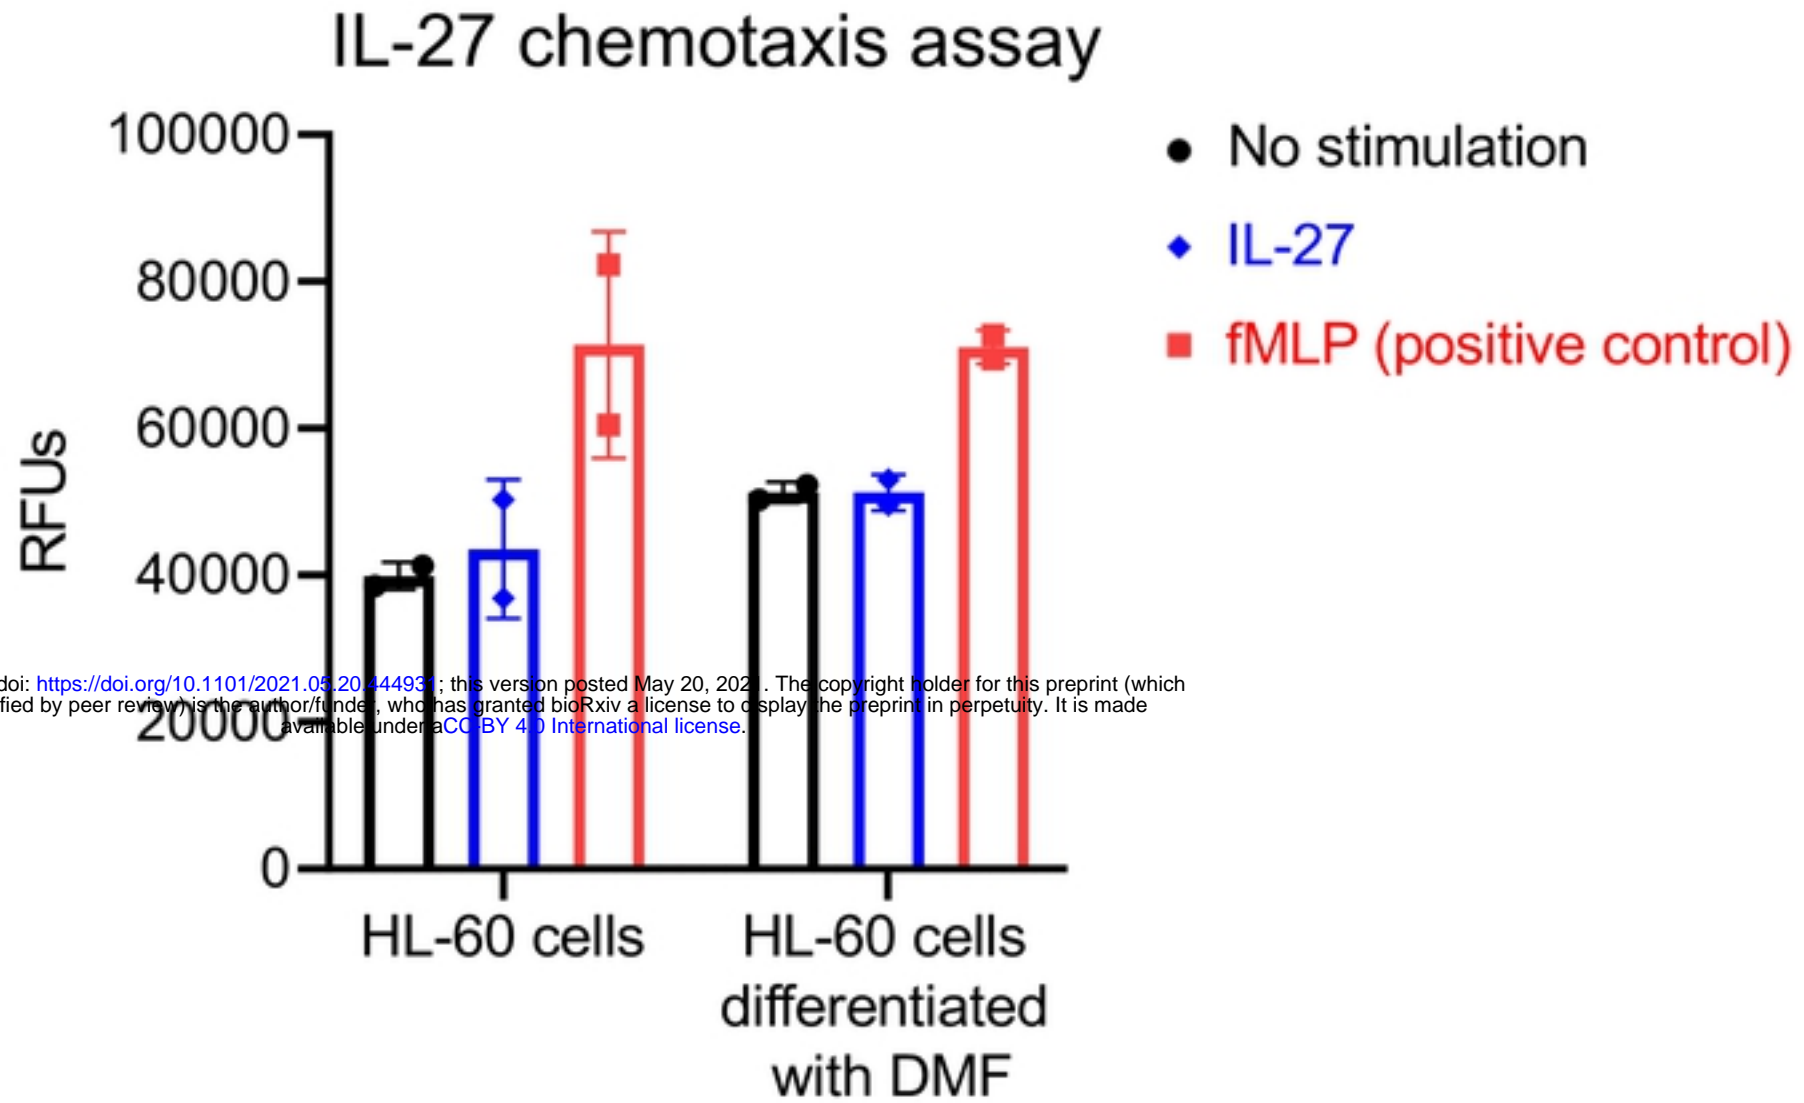

**Supplemental Figure 2. IL-27 does not stimulate myeloid cell chemotaxis.** HL-60 cells were differentiated 7 days in the presence or absence of dimethylformamide (DMF) (9  $\mu$ g/ml), and then placed in Boyden chambers. Cell culture media with or without IL-27 or fMLP (positive-control) was placed in the well below the chamber and incubated for 1 hour. Subsequently, cells which migrated in each well were stained with fluorescent dye and signal intensity was evaluated using a fluorescent plate reader (n=2). No difference in chemotactic activity of granulocytes was observed between the experimental groups.

bioRxiv preprint doi: <https://doi.org/10.1101/2021.05.20.444931>; this version posted May 20, 2021. The copyright holder for this preprint (which was not certified by peer review) is the author/funder, who has granted bioRxiv a license to display the preprint in perpetuity. It is made available under aCC-BY 4.0 International license.

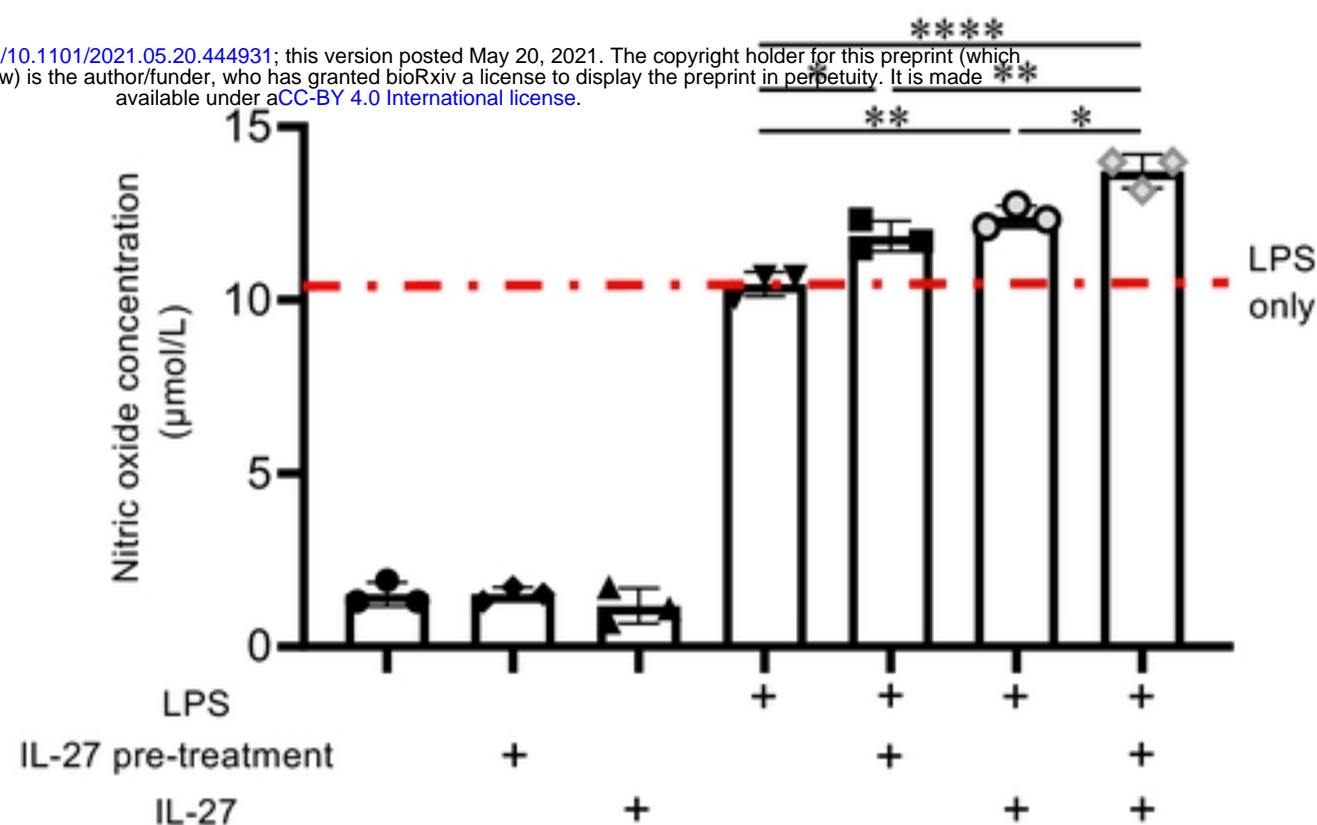

**Supplemental Figure 3. IL-27 enhances LPS-induced NO<sup>-</sup> production by macrophage cultures.** Primary bone marrow derived murine macrophages were pretreated with PBS or IL-27 (50 ng/ml) for 24 hours, and then stimulated with LPS (100 ng/ml) in the presence or absence of IL-27 (50 ng/ml) for 24 hours. Nitrite levels in the culture supernatant was determined via Griess reaction assay, and the data from each experiment are presented with the mean +/- SD for the group (n=3, \* $p$ <0.05, \*\* $p$ <0.01, \*\*\*\* $p$ <0.0001 by one-way ANOVA).

# Supplemental Table 1

**Supplemental Table 1. Top regulatory effect networks of DEGs in mice treated with rAAV-IL-27 versus rAAV-GFP**

|        | Consistency score | Regulators                                                                     | Target molecules in dataset                                                                                                      | Functions                                                                                                                                                                                                |
|--------|-------------------|--------------------------------------------------------------------------------|----------------------------------------------------------------------------------------------------------------------------------|----------------------------------------------------------------------------------------------------------------------------------------------------------------------------------------------------------|
| Day 1  | 1 14.432          | HSP90B1, HBB, EGR2, BCL2, TNFRSF4, LTA                                         | BCL2A1, CXCL13, CCL20, CXCL9, CXCL6, IL7R, AIF1, IL21, IL17A, IL12B, VCAM1, IL17F, RORC, GZMB                                    | Inflammation of body cavity, Inflammation of organ, Inflammation of absolute anatomical region, Inflammation of respiratory system component: <b>Predicted activation</b>                                |
|        | 2 8.05            | NR1H                                                                           | IL12B, PTGES, MERTK, ABCG1, CD5L                                                                                                 | Inflammation of absolute anatomical region, Inflammation of body cavity, Inflammation of respiratory system component, Cell death of immune cells, Apoptosis of blood cells: <b>Predicted activation</b> |
| Day 3  | 1 11.333          | MYD88, TICAM1, GFI1, IL33, IGE, NFKB, NFKB1, NOD2, FOS, IKBKB                  | IL1R1, EDNRB, HDC, IL10, ICAM1, MDM2, SMAD3, C5, GRN                                                                             | Increased levels of creatinine: <b>Predicted suppression</b>                                                                                                                                             |
|        | 2 10.436          | JUNB, SMARCA4, STAT3, TNFSF11, IL1, IL1A, OSM, CHUK, IL6R, CD40LG, TGFB2, RELA | IFI16, CSF3, NOS3, IL11, IGF2, TNFRSF11B, RB1, SMAD3, NOTCH1, HES1                                                               | Increased activation of alkaline phosphatase: <b>Predicted suppression</b>                                                                                                                               |
| Day 7  | 1 3.175           | TICAM1                                                                         | IL12A, IRF7, CCL5, IFNG, TNF, IL1A, DDX58, CH25H, FPR1, ICAM1, CCRL2, IKBKE                                                      | Cell movement of blood cells: <b>Predicted suppression</b>                                                                                                                                               |
|        | 2 3.175           | TICAM1                                                                         | IL12A, IRF7, CCL5, IFNG, TNF, IL1A, DDX58, CH25H, FPR1, ICAM1, CCRL2, IKBKE                                                      | Leukocyte migration: <b>Predicted suppression</b>                                                                                                                                                        |
| Day 14 | 1 4.025           | IL1B                                                                           | CCR7, ITGAM, OSM, ICOSLG/ LOC102723996, CD137, CD137L, SMF, CD11C, CD11E, CD137R4, TNF, IL1A, CD80, IL17A, FAS, CCL4, MIF, ICAM1 | Adhesion of mononuclear leukocytes: <b>Predicted suppression</b>                                                                                                                                         |
|        | 2 3.873           | IL17A                                                                          | TGFA, HBEGF, LIF, COL1A1, SLC2A1, IL6, FOS, TLR4, AREG, TNF, IL1A, TIMP1, CSF3, FAS, IL36G                                       | Proliferation of connective tissue cells: <b>Predicted suppression</b>                                                                                                                                   |

bioRxiv preprint doi: <https://doi.org/10.1101/2021.05.20.444931>; this version posted May 20, 2021. The copyright holder for this preprint (which was not certified by peer review) is the author/funder, who has granted bioRxiv a license to display the preprint in perpetuity. It is made available under aCC-BY 4.0 International license.
